# Supplementary material
Source: publisher site journal article supplement (https://www.dovepress.com/article/269255)
Supplement: Supplementary file 1 [file get_supplementary_file.php]

**Supplementary 1: Version-1 scale**

**Chinese and western medicine medication adherence scale for patients with chronic kidney disease**Completion time: _________ person: _________ date: ___________

**Knowledge Part**

**Basic knowledge of medicine**

1. Do you know the therapeutic effect of each drug you are taking?
a. completely aware b. mostly aware c. almost aware d. somewhat aware e. not at all aware
2. Do you know the side effects of each drug you are taking?
a. completely aware b. mostly aware c. almost aware d. somewhat aware e. not at all aware
3. Do you know the name of the medicine you are taking?
a. completely aware b. mostly aware c. almost aware d. somewhat aware e. not at all aware
4. Do you know how to use the medicine you are taking?
a. completely aware b. mostly aware c. almost aware d. somewhat aware e. not at all aware
5. Do you understand the interactions among the drugs that you are taking?
a. completely aware b. mostly aware c. almost aware d. somewhat aware e. not at all aware

**Chinese medicine decoction knowledge**

1. Do you know what utensils should be used for Chinese medicine decoction?
   a. completely aware b. mostly aware c. almost aware d. somewhat aware e. not at all aware
   7. Do you know the yield of water in Chinese medicine decoction?
   a. completely aware b. mostly aware c. almost aware d. somewhat aware e. not at all aware
   8.Do you know the soak of prepared slice of herbal drugs before decocting?
   a. completely aware b. mostly aware c. almost aware d. somewhat aware e. not at all aware
   9. Do you know decoction times of traditional Chinese medicine ?
   a. completely aware b. mostly aware c. almost aware d. somewhat aware e. not at all aware
   10. Do you know the cooking temperature of Chinese medicine decoction?
   a. completely aware b. mostly aware c. almost aware d. somewhat aware e. not at all aware
   11. Do you know the decoction time of traditional Chinese medicine?
   a. completely aware b. mostly aware c. almost aware d. somewhat aware e. not at all aware

12. Do you know the following situations that require special handling in the decoction process of traditional Chinese medicine (including be decocted first, be decocted later, wrap-boiling, melting, be decocted alone, and infusion)?
a. completely aware b. mostly aware c. almost aware d. somewhat aware e. not at all aware

**Knowledge of traditional Chinese medicine**

13. Do you know the best temperature for taking traditional Chinese medicine?
a. completely aware b. mostly aware c. almost aware d. somewhat aware e. not at all aware
14. Do you know the best time to take traditional Chinese medicine?
a. completely aware b. mostly aware c. almost aware d. somewhat aware e. not at all aware
15. Do you know the dosage of traditional Chinese medicine?
a. completely aware b. mostly aware c. almost aware d. somewhat aware e. not at all aware
16. Do you know the dietary contraindications during taking Chinese medicine?
a. completely aware b. mostly aware c. almost aware d. somewhat aware e. not at all aware

**Belief Part**

**Medication belief**

17.I think taking drugs will improve my quality of life?
a. strongly disagree b. disagree c. neutral d. agree e. strongly agree
18.I think the taste of traditional Chinese medicine is acceptable?
a. strongly disagree b. disagree c. neutral d. agree e. strongly agree
19. I think there is no difficulty in decocting and taking Chinese medicine by oneself for a long time?
a. strongly disagree b. disagree c. neutral d. agree e. strongly agree
20.I think it is normal to have all kinds of side effects after having drugs?
a. strongly disagree b. disagree c. neutral d. agree e. strongly agree
21.I think it makes me hard to do anything else?
a. strongly disagree b. disagree c. neutral d. agree e. strongly agree

**Behavior Part**

**Taking medicine**

22.Have you ever forgotten to take your medicine in the past month?
a. never b. occasionally c. sometimes d. often e. all the time
23. Have you ever been careless about taking medicine in the past month?
a. never b. occasionally c. sometimes d. often e. all the time
24. Have you ever stopped taking medication in the past month when you felt your symptoms improved?
a. never b. occasionally c. sometimes d. often e. all the time
25.Have you ever stopped taking medication in the past month when you felt worse? a. never b. occasionally c. sometimes d. often e. all the time
26. Have you changed the prescription of traditional Chinese medicine by yourself in the past month?
a. never b. occasionally c. sometimes d. often e. all the time

**Notes**: Copyright © 2019 Dove Medical Press Limited. Adapted from Tan J, Luo L, Zhang M, et al. A Chinese and Western medication adherence scale in patients with Chronic Kidney Disease. Patient Prefer Adherence. 2019;13:1487–1495.13

**Supplementary 2: Version-2 scale**

**Chinese and western medicine medication adherence scale for patients with chronic kidney disease**Completion time: _________ person: _________ date: ___________

**Knowledge Part**

**Basic knowledge of medicine**

1. Do you know the therapeutic effect of each drug you are taking?
a. completely aware b. mostly aware c. almost aware d. somewhat aware e. not at all aware
2. Do you know how to use the medicine you are taking?
a. completely aware b. mostly aware c. almost aware d. somewhat aware e. not at all aware

**Chinese medicine decoction knowledge**

3. Do you know what utensils should be used for Chinese medicine decoction?
a. completely aware b. mostly aware c. almost aware d. somewhat aware e. not at all aware
4.Do you know the soak of prepared slice of herbal drugs before decocting?
a. completely aware b. mostly aware c. almost aware d. somewhat aware e. not at all aware

5. Do you know the following situations that require special handling in the decoction process of traditional Chinese medicine (including be decocted first, be decocted later, wrap-boiling, melting, be decocted alone, and infusion)?
a. completely aware b. mostly aware c. almost aware d. somewhat aware e. not at all aware

**Knowledge of traditional Chinese medicine**

6. Do you know the best temperature for taking traditional Chinese medicine?
a. completely aware b. mostly aware c. almost aware d. somewhat aware e. not at all aware
7. Do you know the best time to take traditional Chinese medicine?
a. completely aware b. mostly aware c. almost aware d. somewhat aware e. not at all aware
8. Do you know the dosage of traditional Chinese medicine?
a. completely aware b. mostly aware c. almost aware d. somewhat aware e. not at all aware
9. Do you know the dietary contraindications during taking Chinese medicine?
a. completely aware b. mostly aware c. almost aware d. somewhat aware e. not at all aware

**Belief Part**

**Medication belief**

10.I think the taste of traditional Chinese medicine is acceptable?
a. strongly disagree b. disagree c. neutral d. agree e. strongly agree
11. I think there is no difficulty in decocting and taking Chinese medicine by oneself for a long time?
a. strongly disagree b. disagree c. neutral d. agree e. strongly agree
12.I think it is normal to have all kinds of side effects after having drugs?
a. strongly disagree b. disagree c. neutral d. agree e. strongly agree

**Behavior Part**

**Taking medicine**

13. Have you ever stopped taking medication in the past month when you felt your symptoms improved?
a. never b. occasionally c. sometimes d. often e. all the time
14.Have you ever stopped taking medication in the past month when you felt worse?

a. never b. occasionally c. sometimes d. often e. all the time
15. Have you changed the prescription of traditional Chinese medicine by yourself in the past month?
a. never b. occasionally c. sometimes d. often e. all the time

**Notes**: Copyright © 2019 Dove Medical Press Limited. Adapted from Tan J, Luo L, Zhang M, et al. A Chinese and Western medication adherence scale in patients with Chronic Kidney Disease. Patient Prefer Adherence. 2019;13:1487–1495.13

**Supplementary 3:** Item Characteristic Curve (ICC) and Item Information Curve (IIC) of 26 items in the version-1 scale.


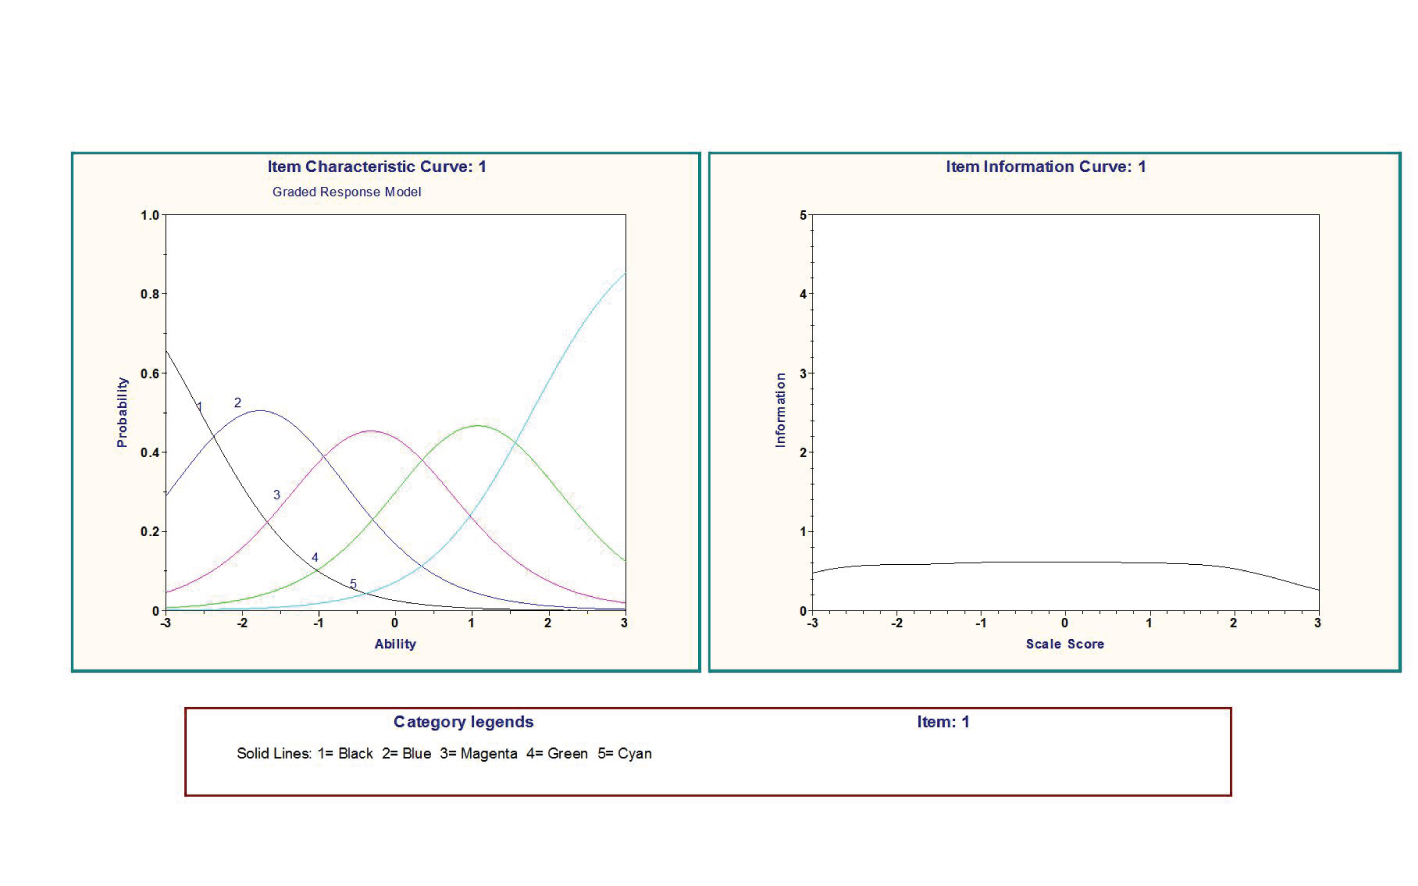


Figure 1: ICC and IIC of item 1 in the version-1 scale


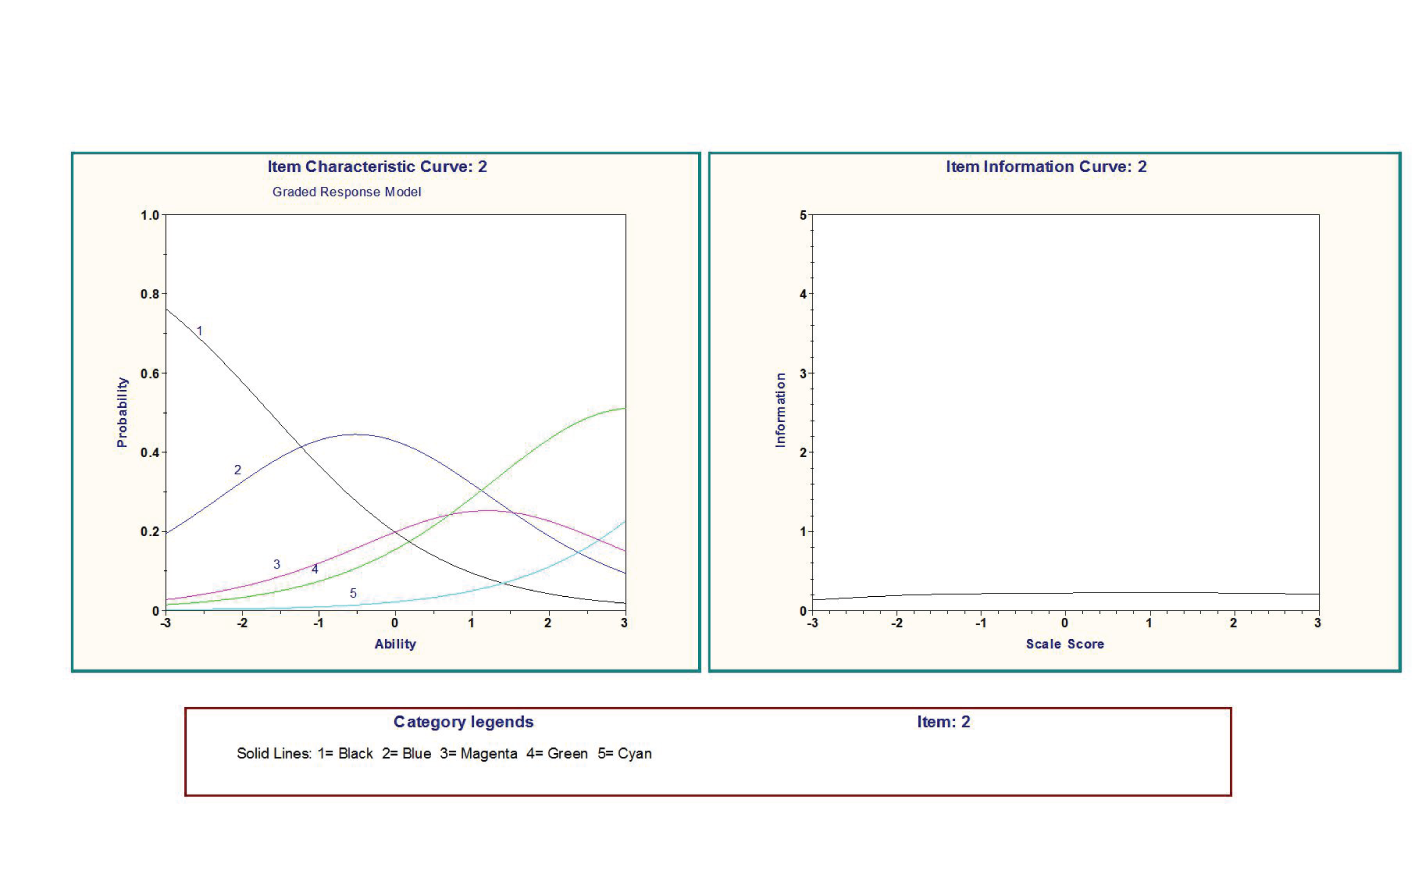
Figure 2: ICC and IIC of item 2 in the version-1 scale


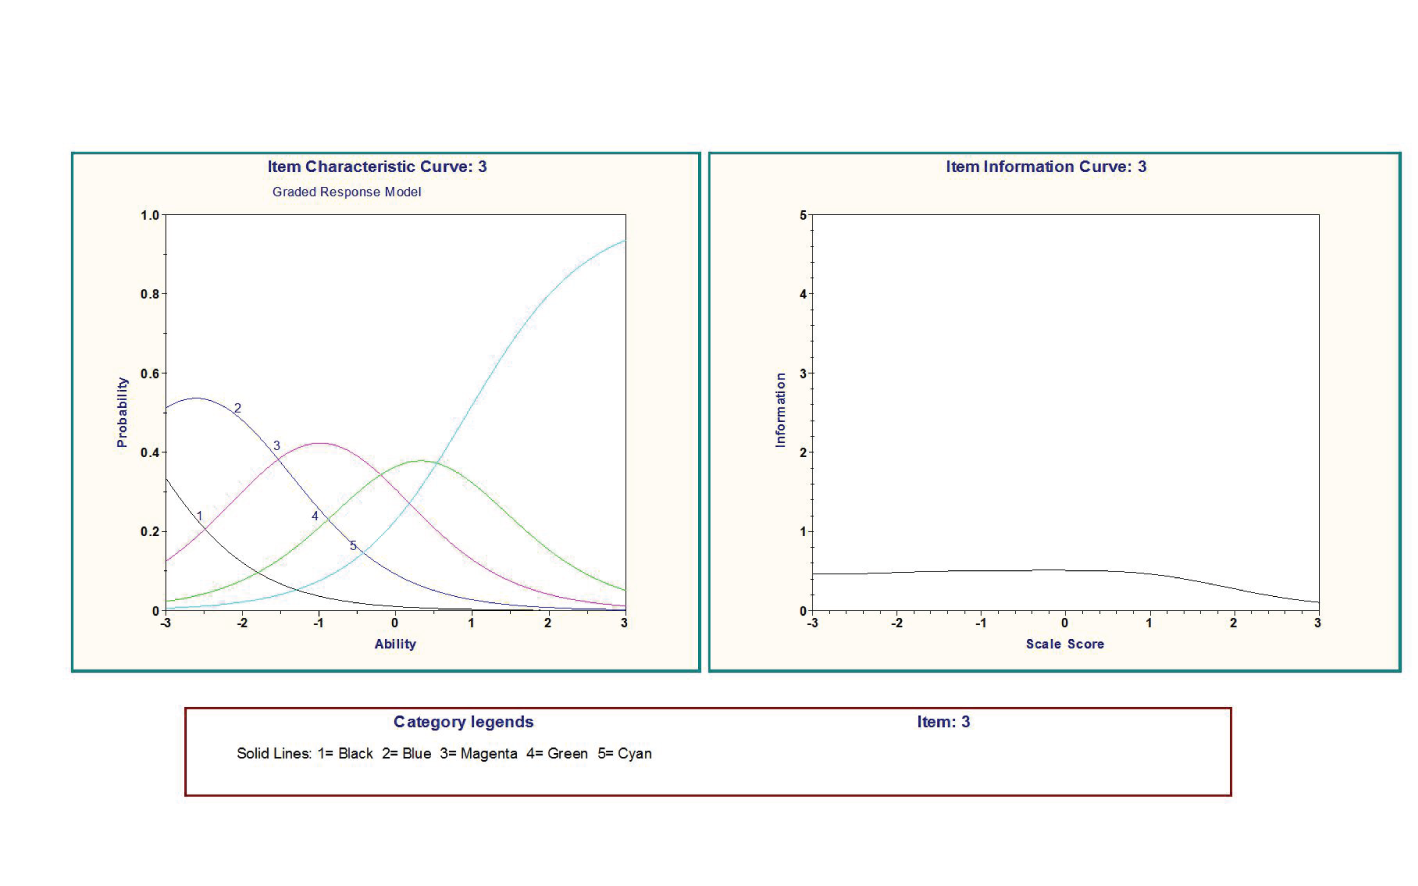
Figure 3: ICC and IIC of item 3 in the version-1 scale


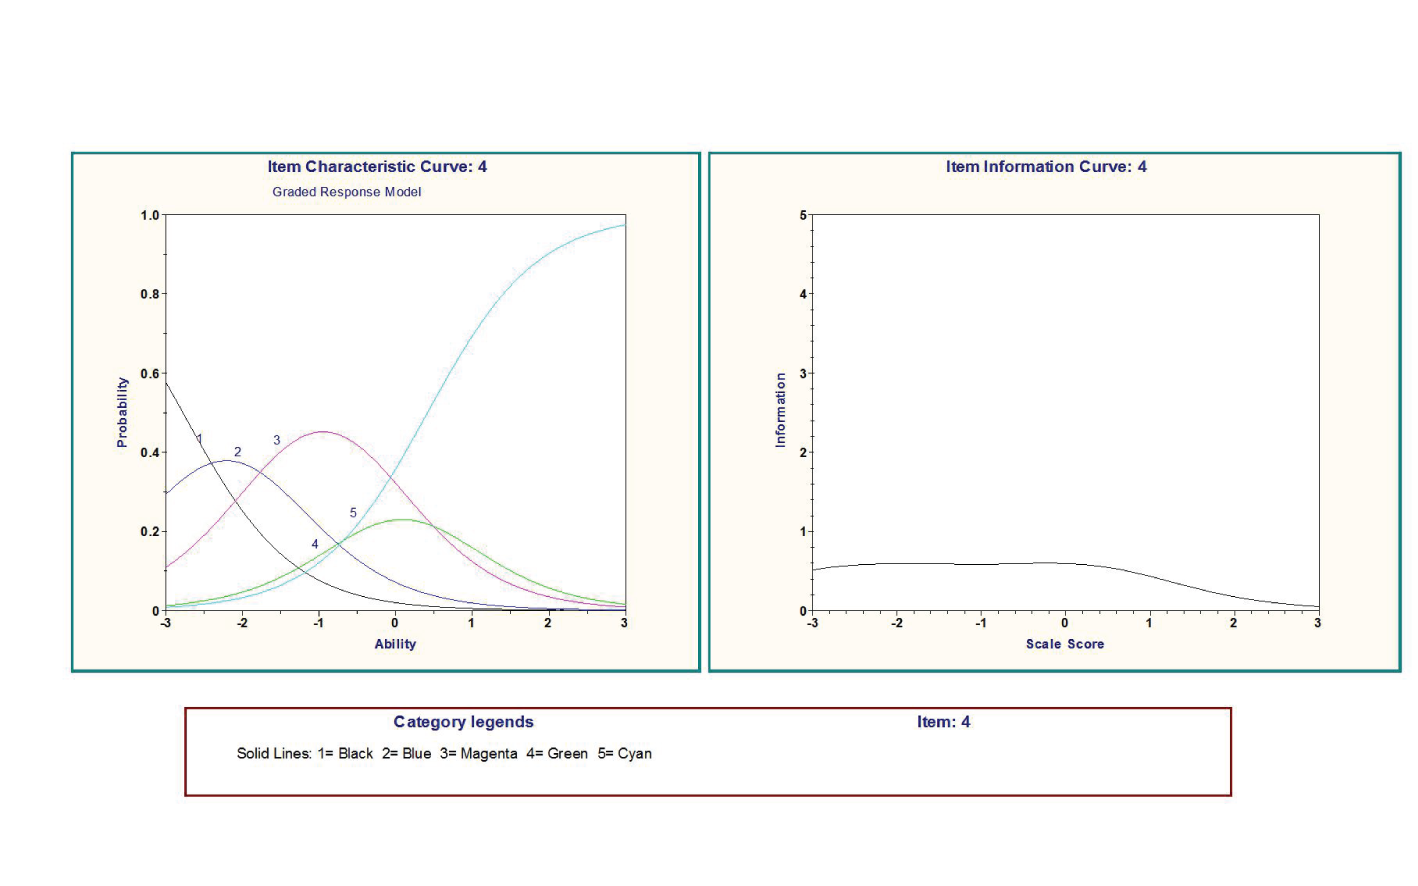
Figure 4: ICC and IIC of item 4 in the version-1 scale


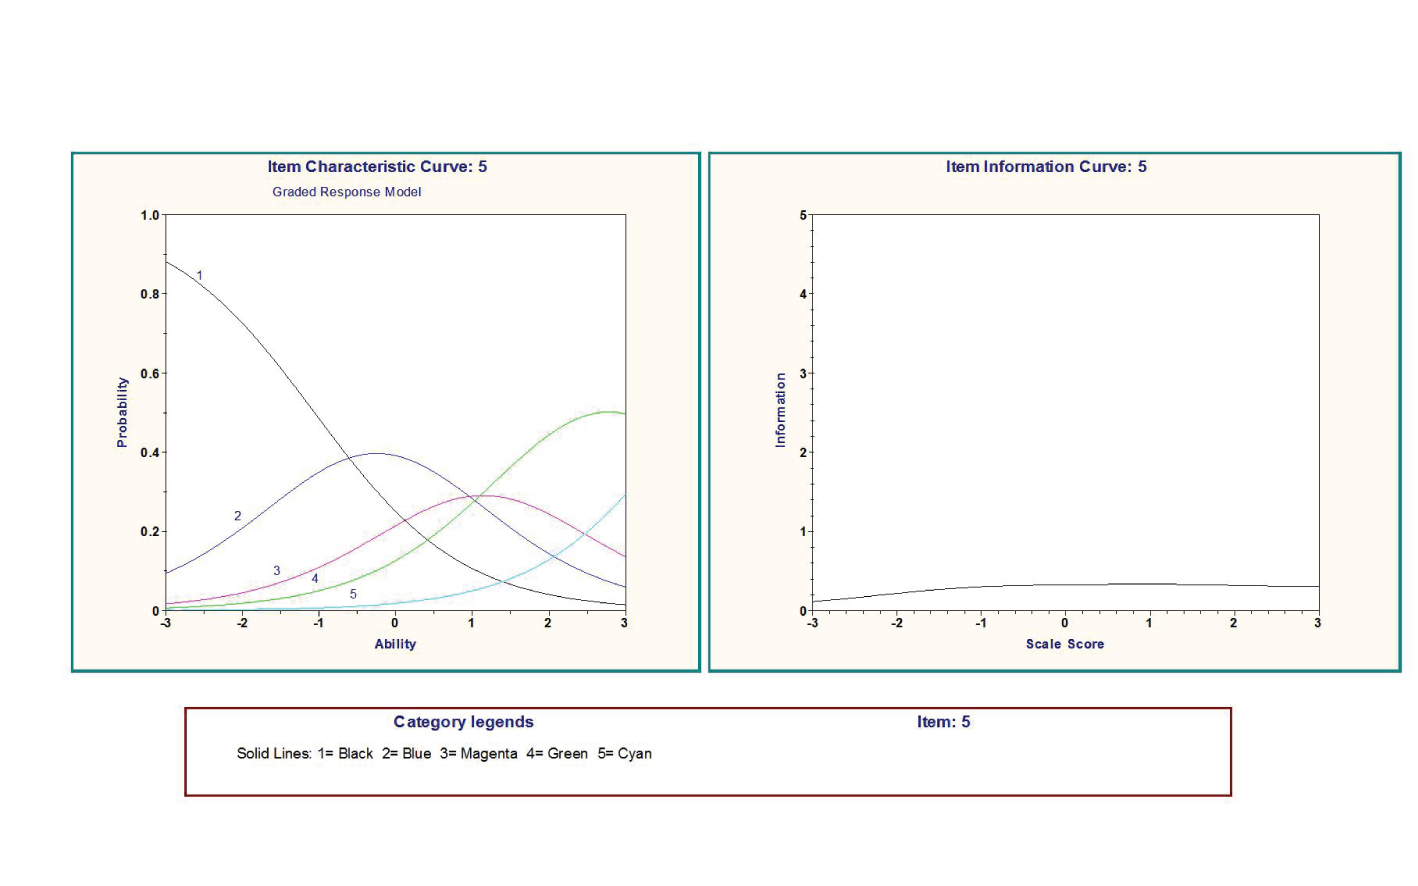
Figure 5: ICC and IIC of item 5 in the version-1 scale


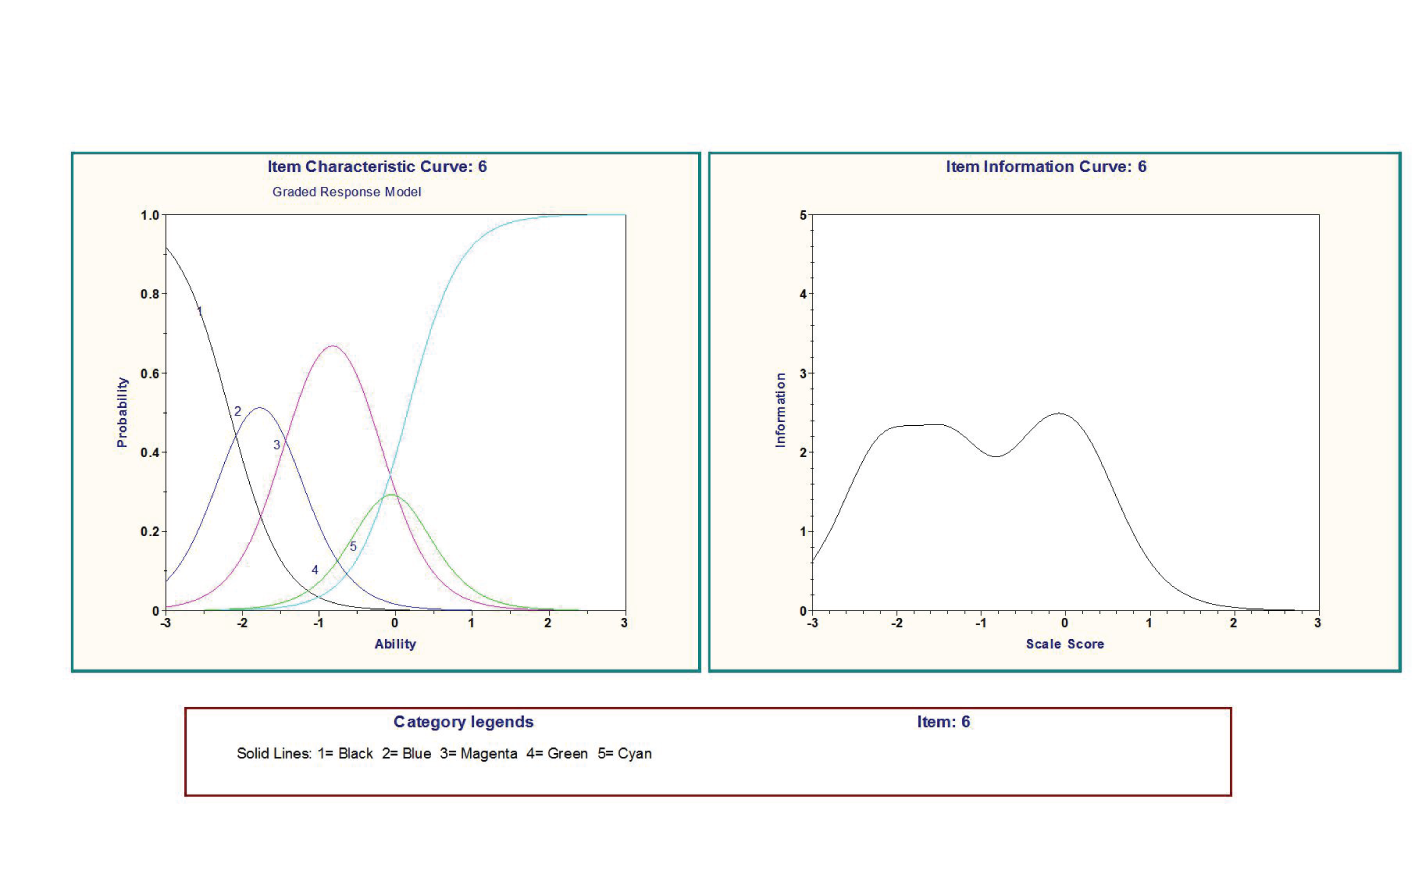
Figure 6: ICC and IIC of item 6 in the version-1 scale


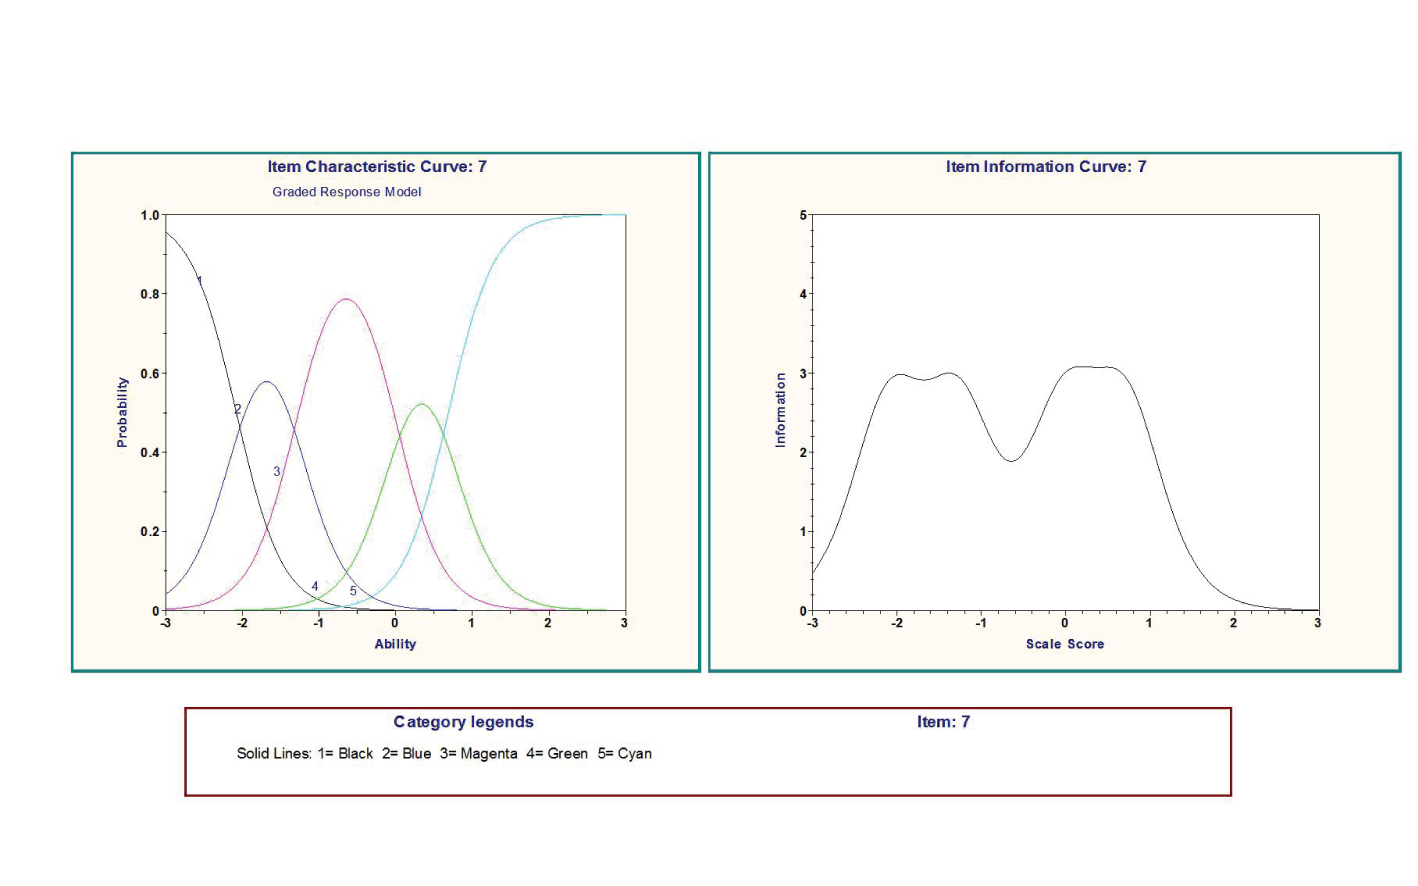
Figure 7: ICC and IIC of item 7 in the version-1 scale


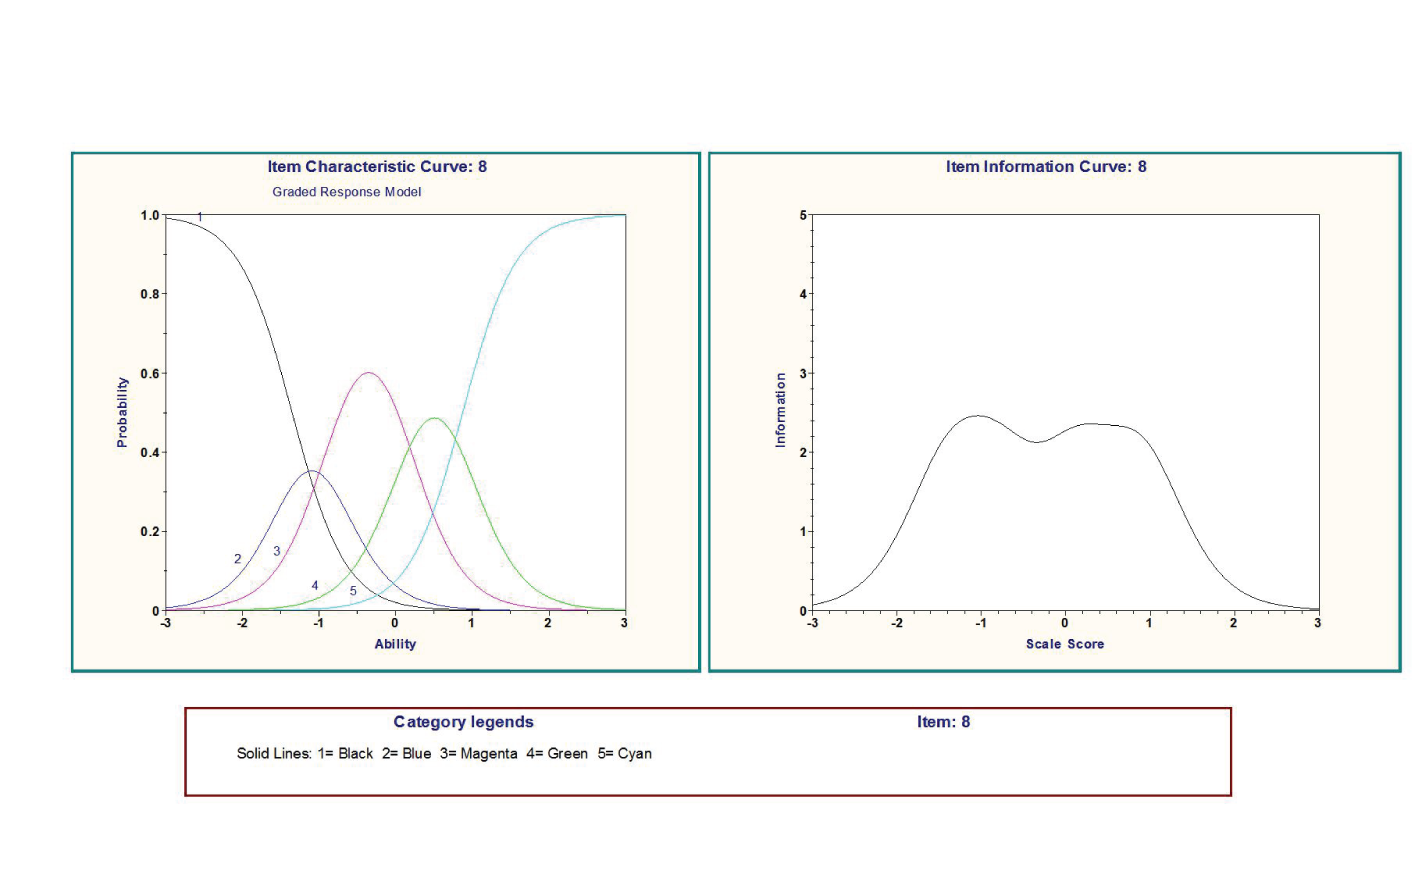
Figure 8: ICC and IIC of item 8 in the version-1 scale


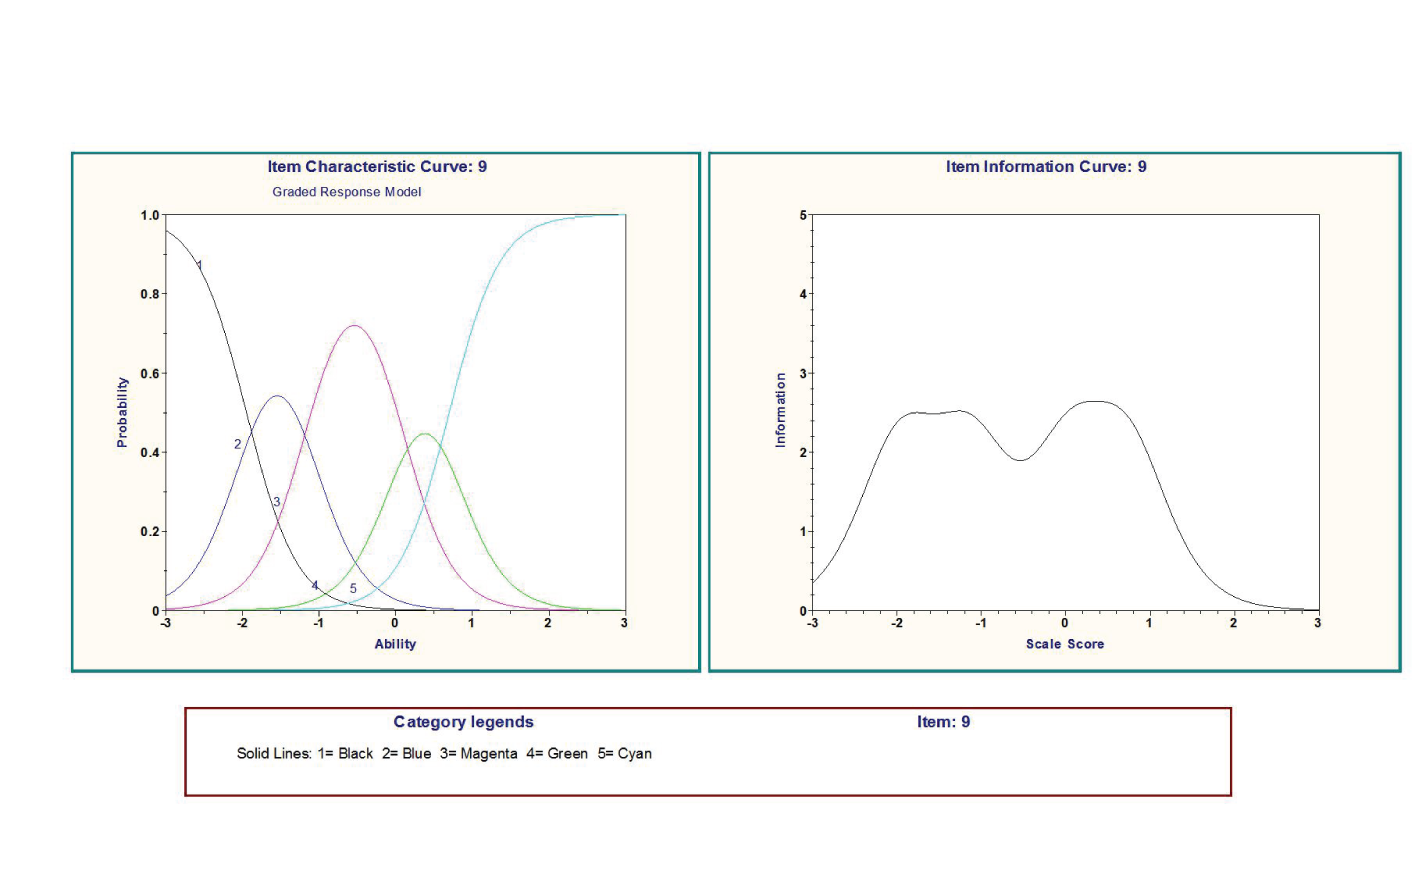
Figure 9: ICC and IIC of item 9 in the version-1 scale


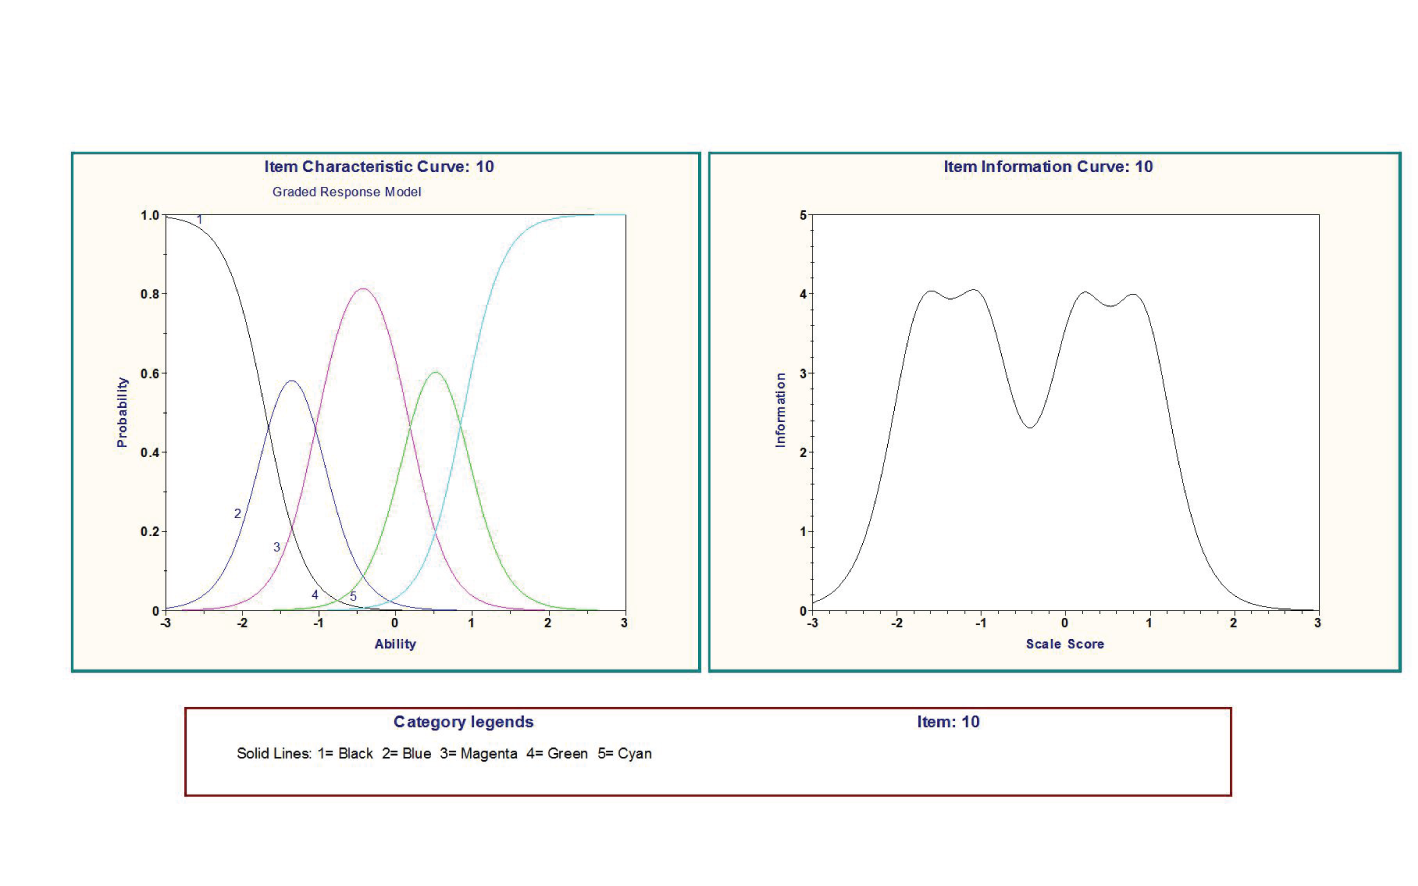
Figure 10: ICC and IIC of item 10 in the version-1 scale


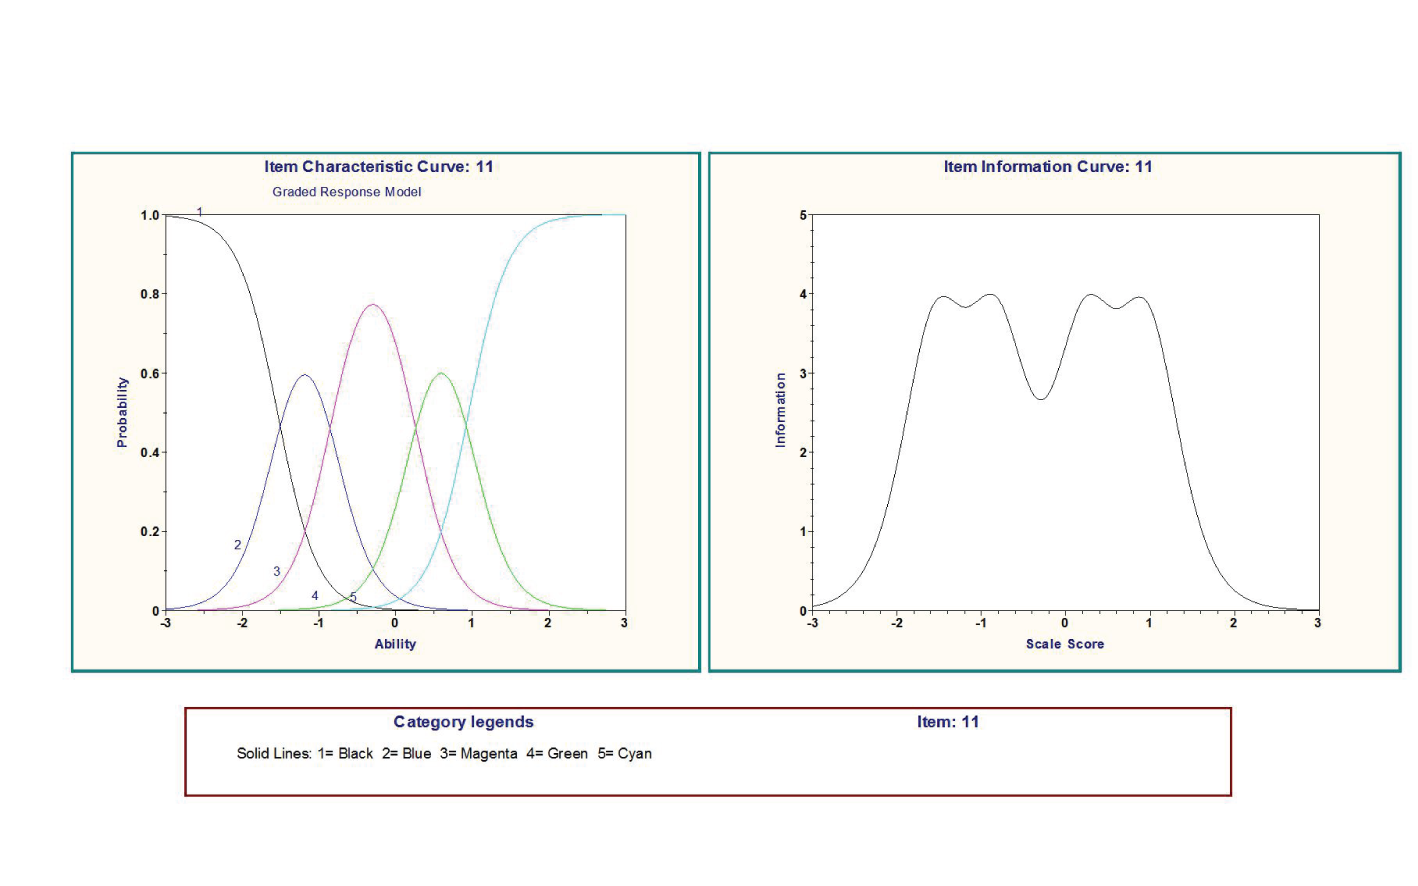
Figure 11: ICC and IIC of item 11 in the version-1 scale


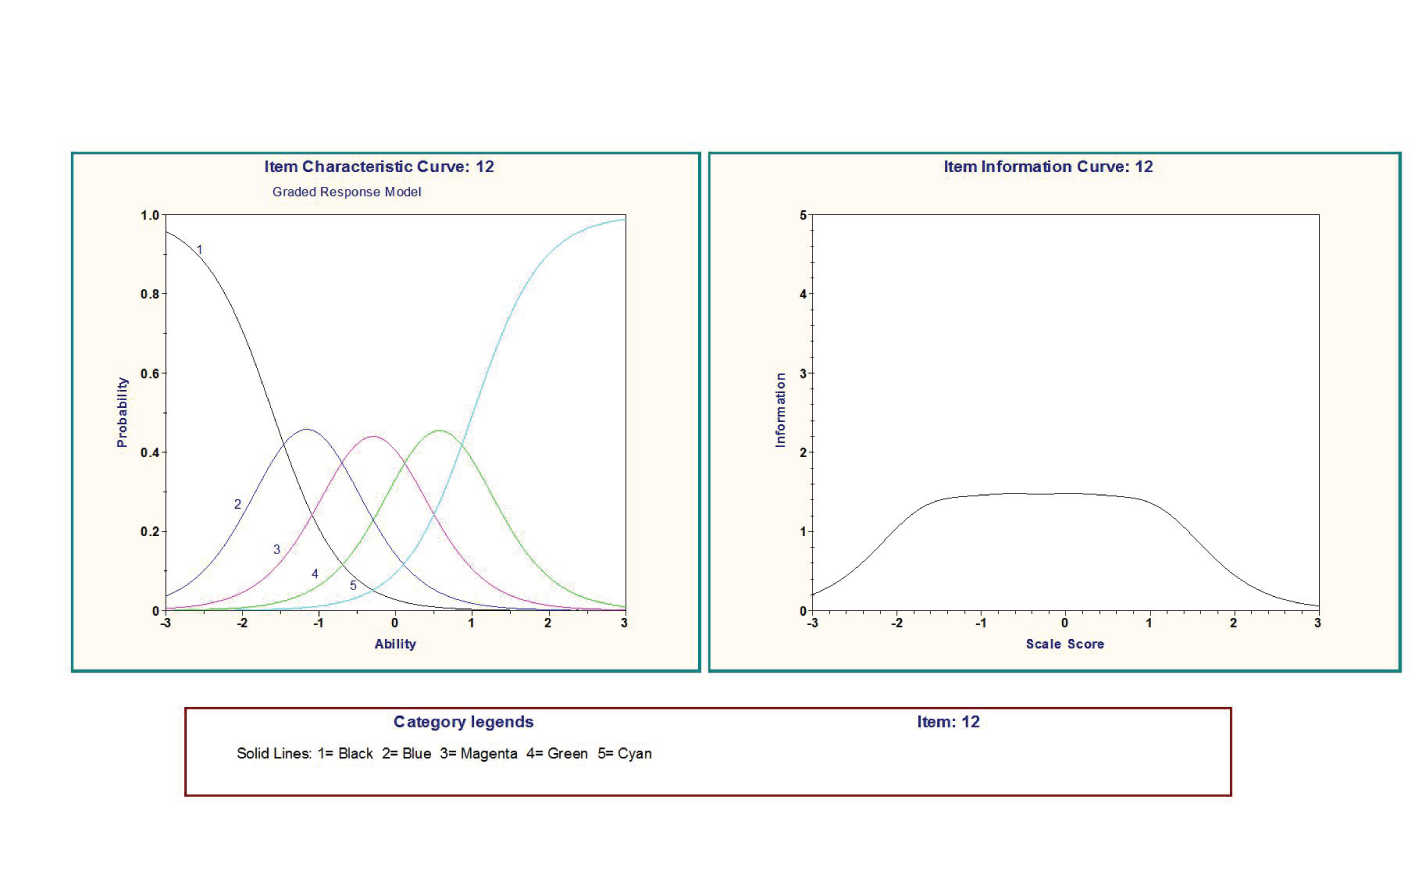
Figure 12: ICC and IIC of item 12 in the version-1 scale


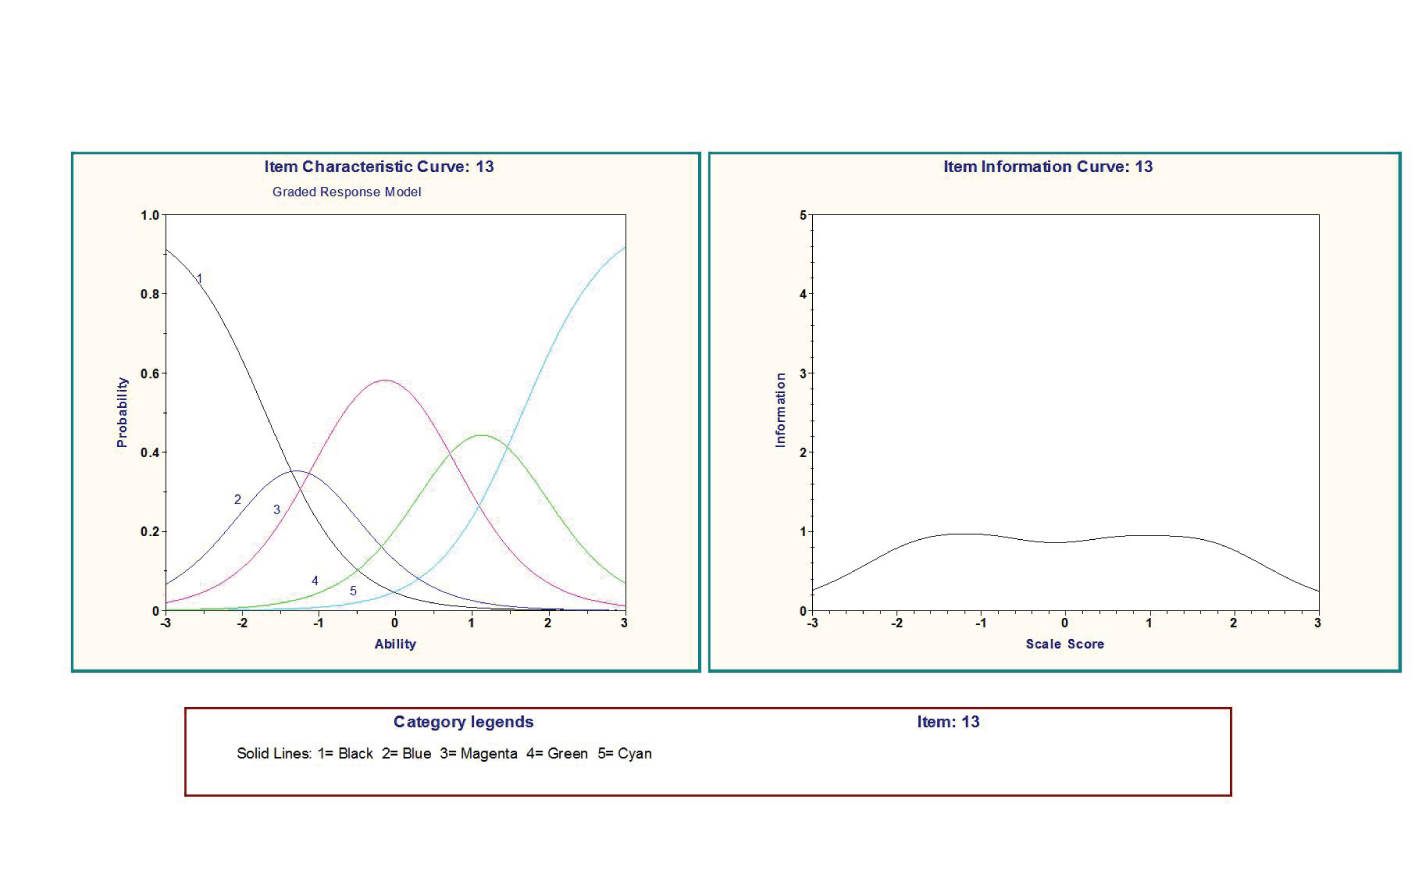
Figure 13: ICC and IIC of item 13 in the version-1 scale


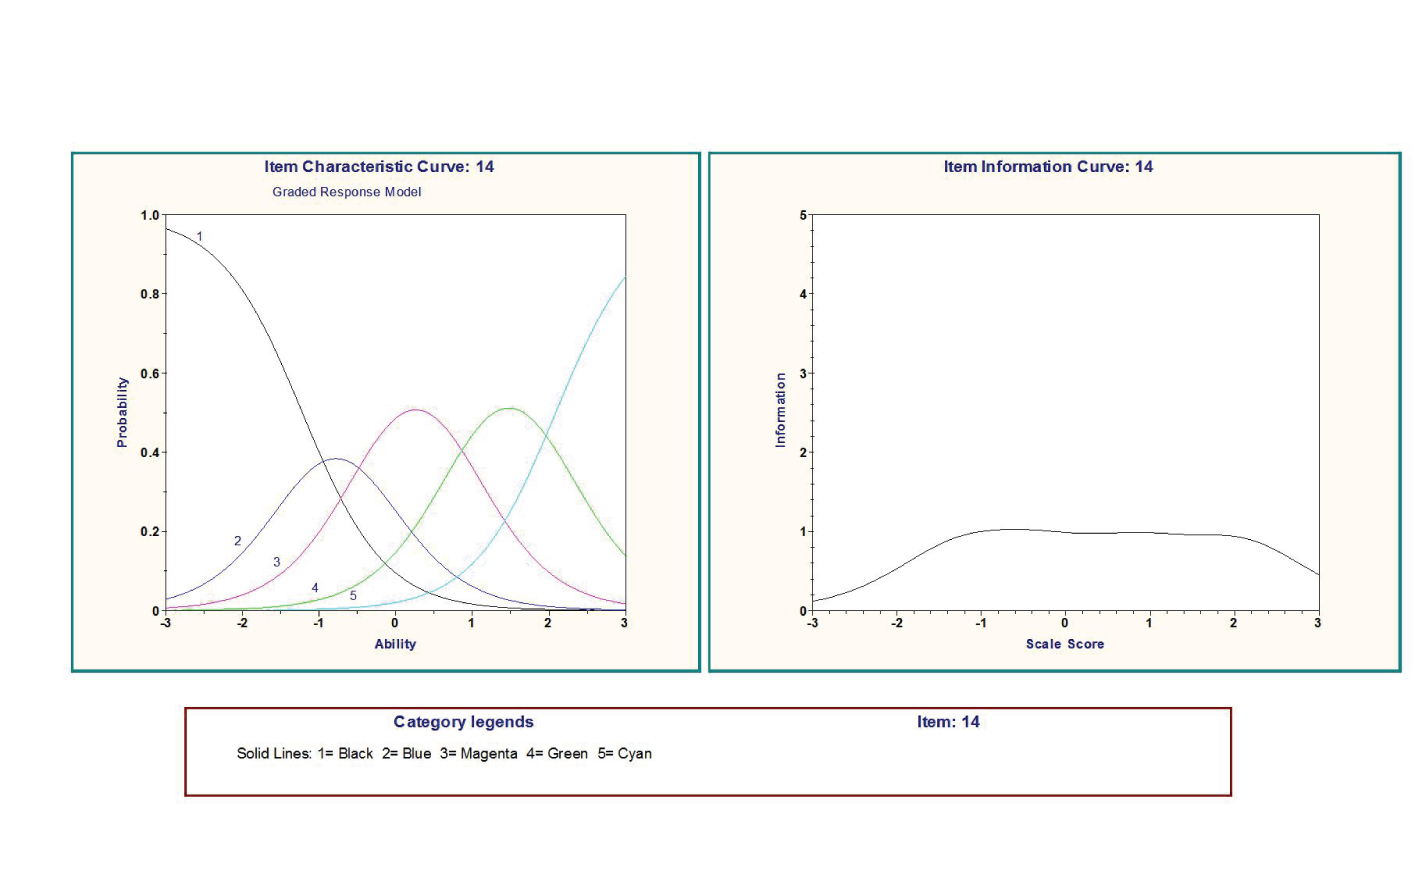
Figure 14: ICC and IIC of item 14 in the version-1 scale


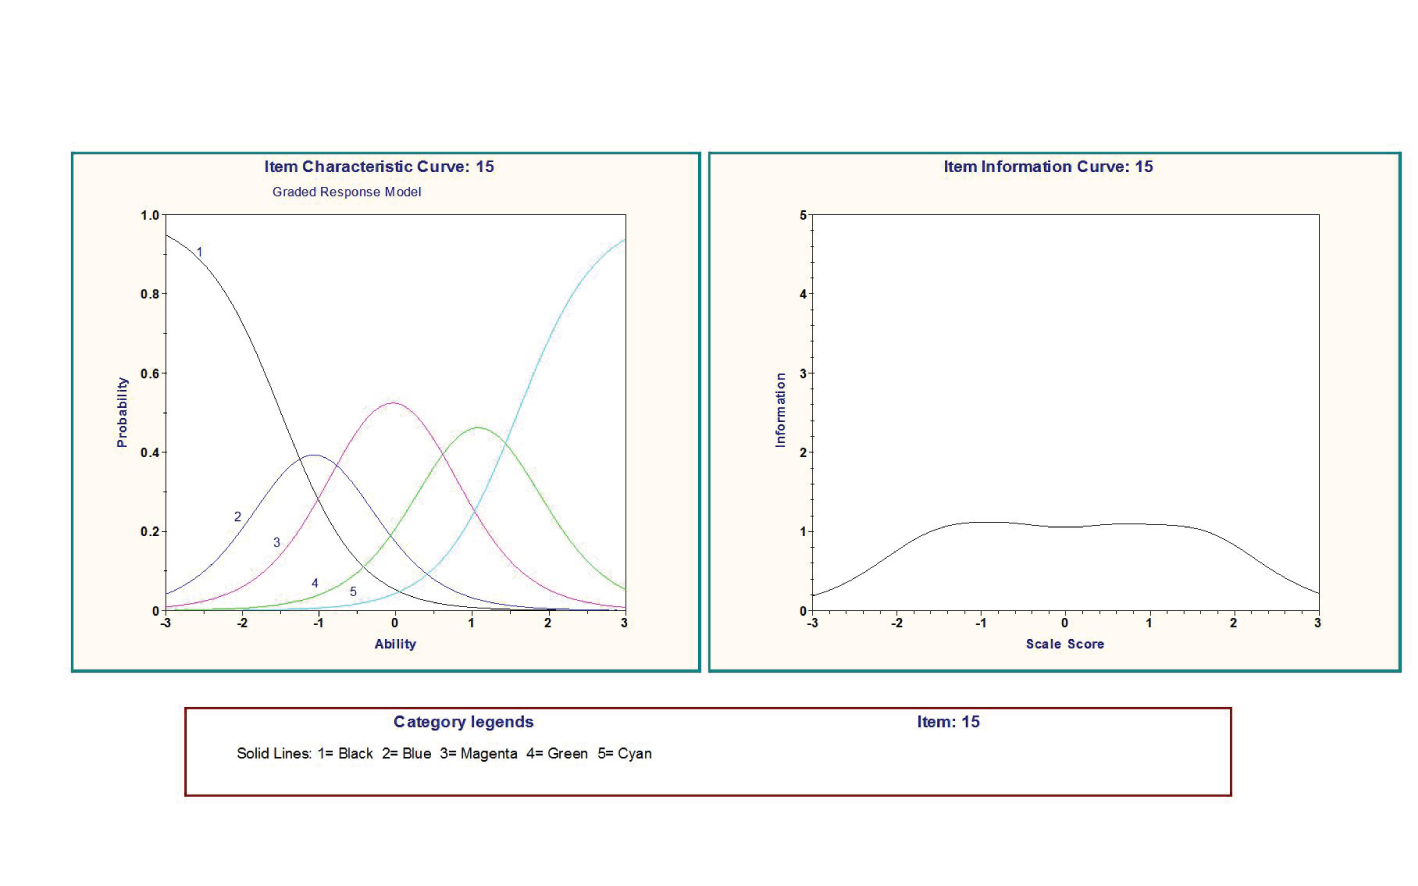


Figure 15: ICC and IIC of item 15 in the version-1 scale


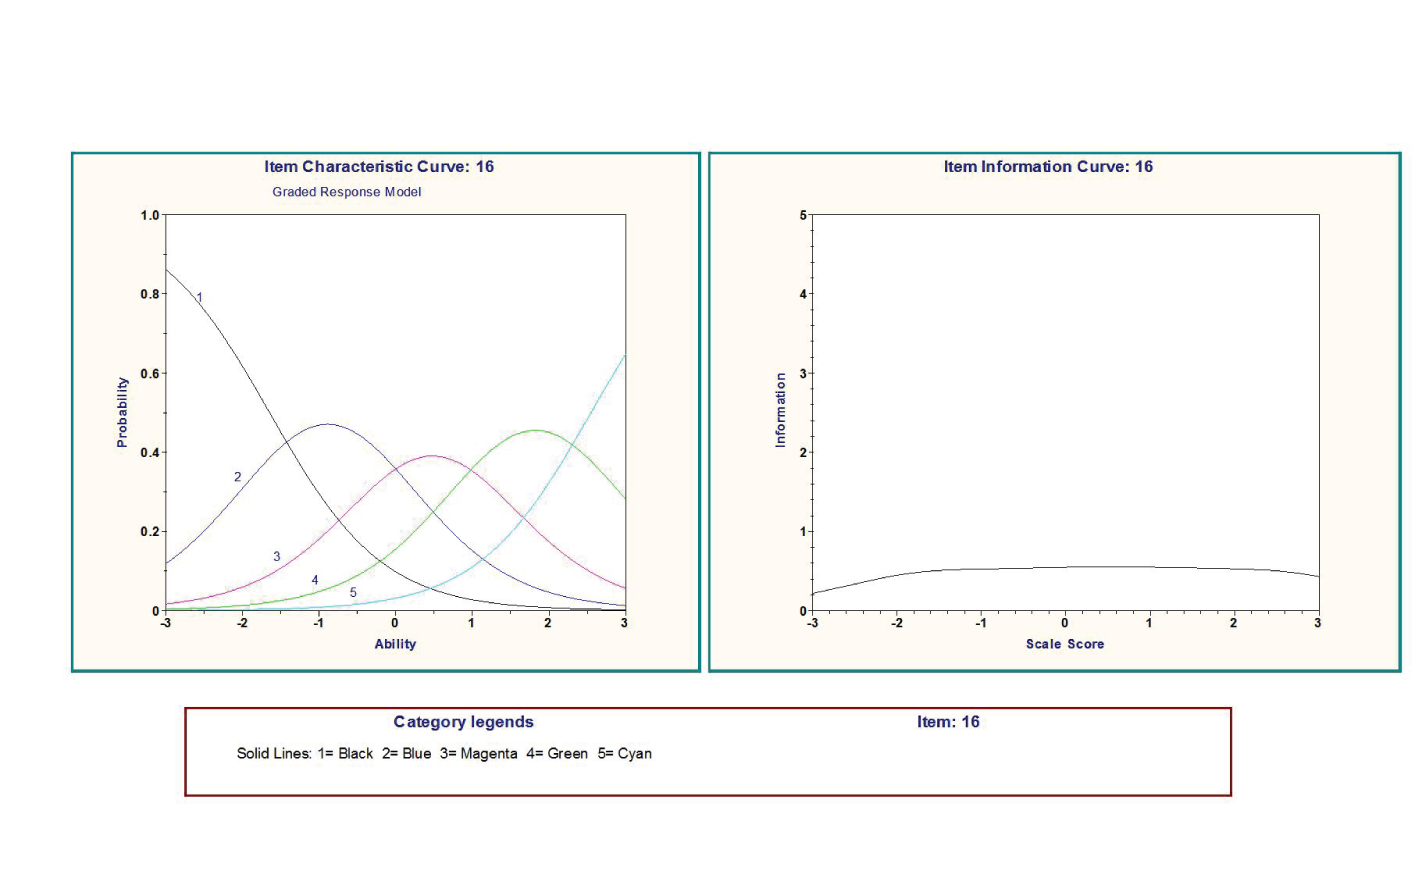
Figure 16: ICC and IIC of item 16 in the version-1 scale


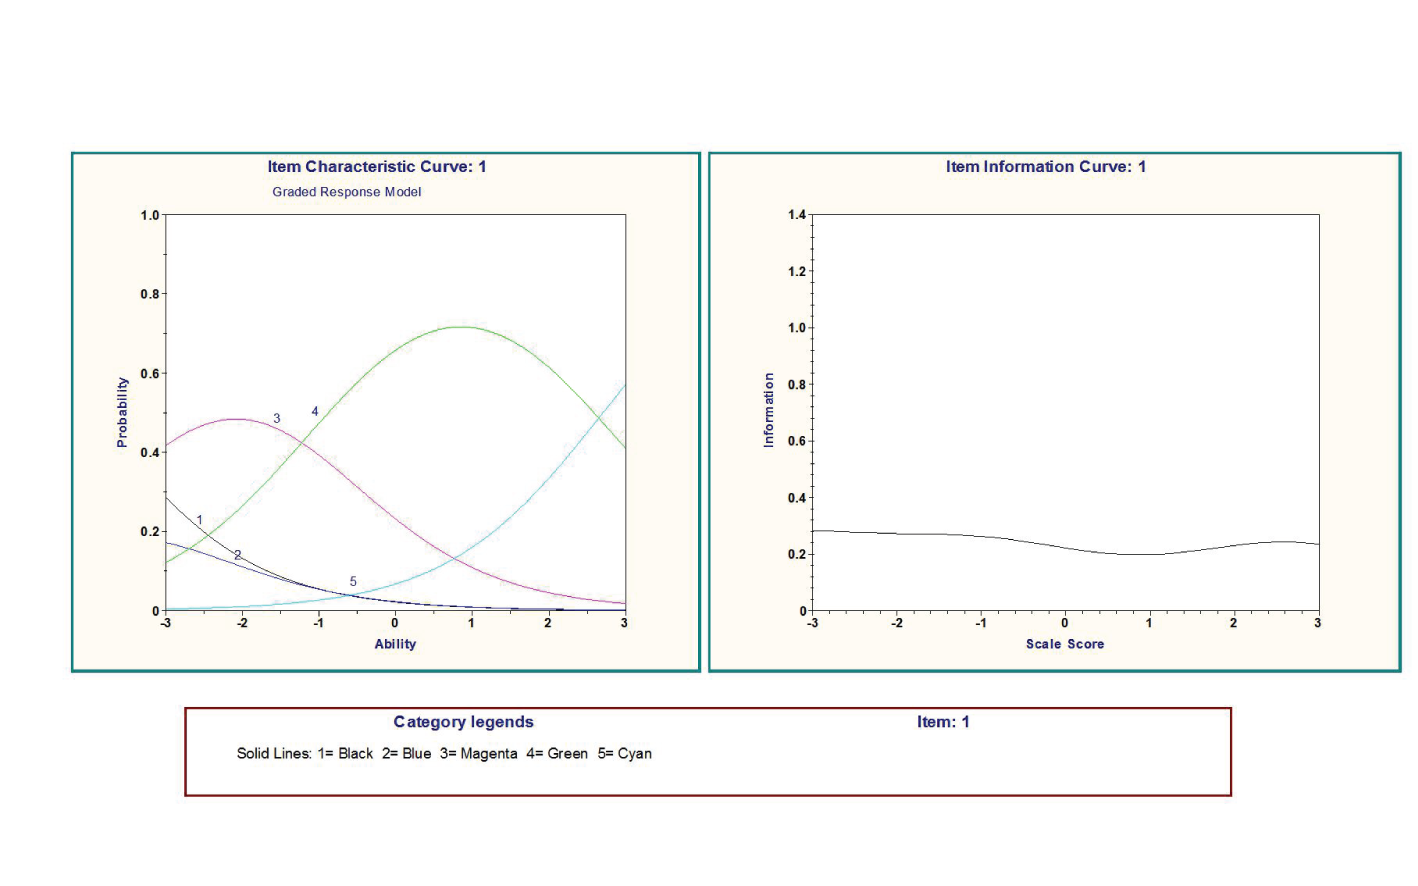
Figure 17: ICC and IIC of item 17 in the version-1 scale


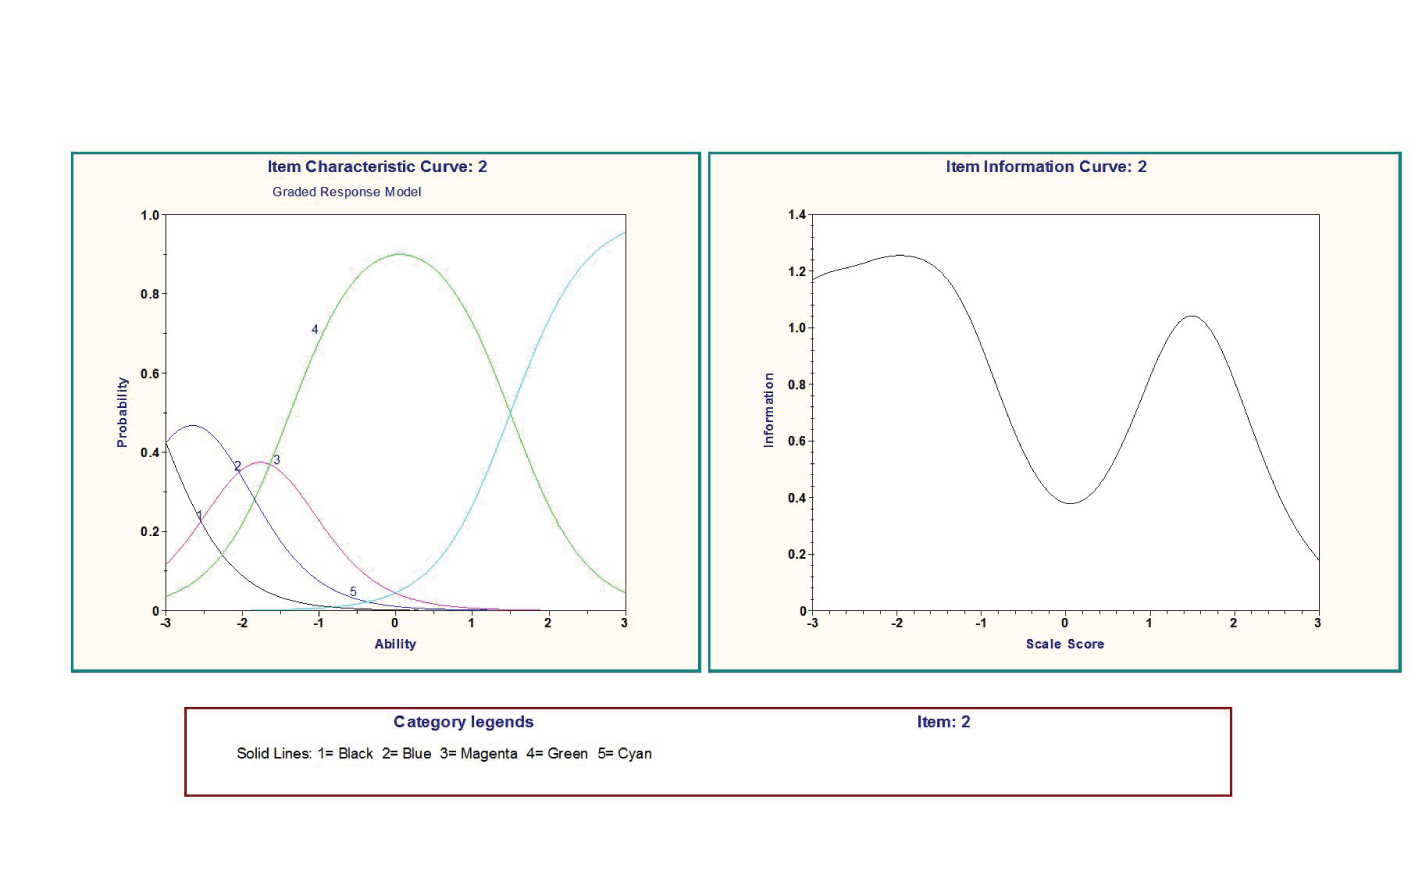


Figure 18: ICC and IIC of item 18 in the version-1 scale


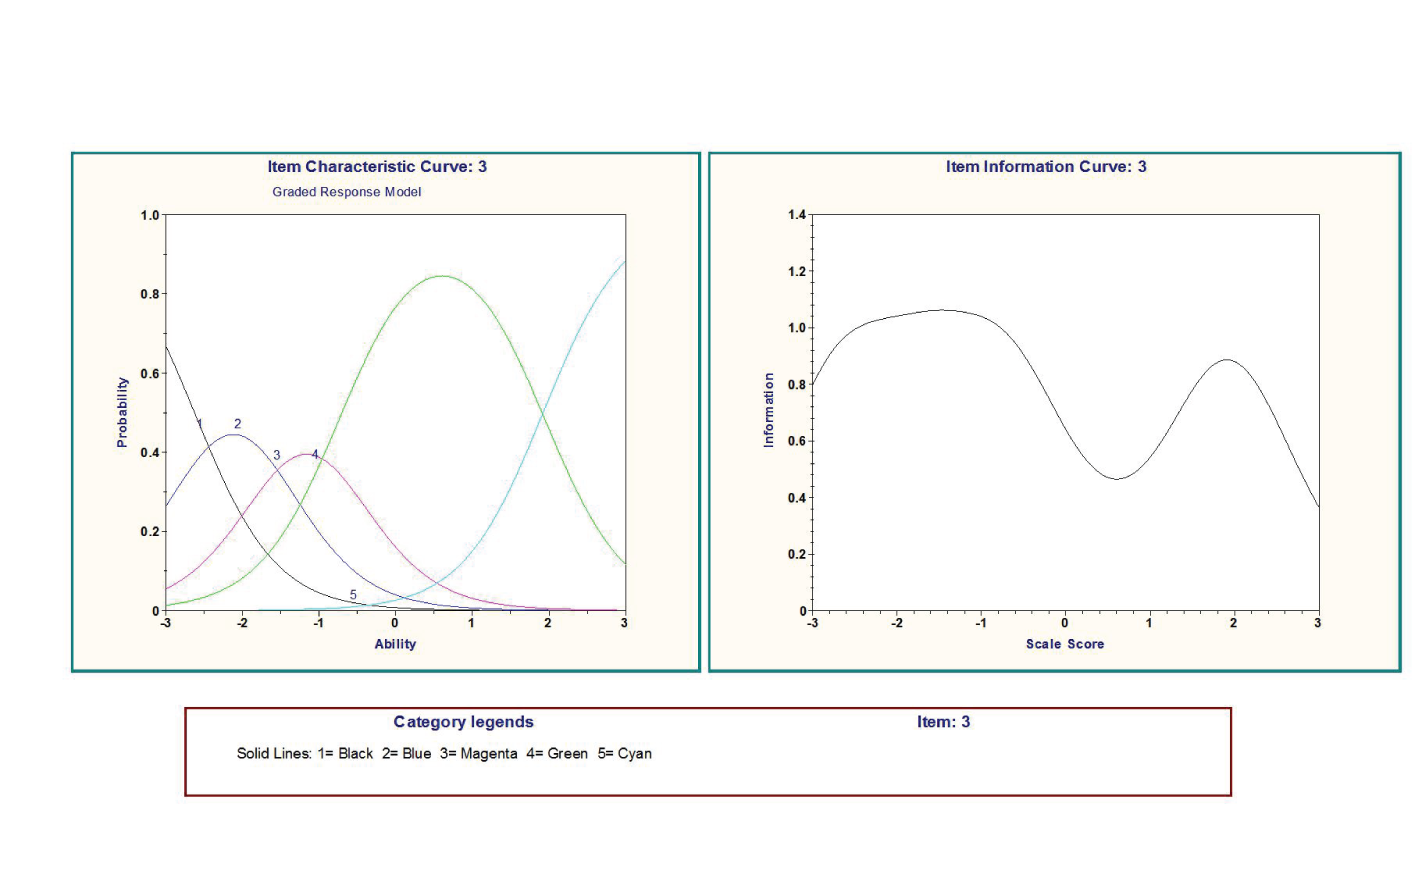
Figure 19: ICC and IIC of item 19 in the version-1 scale


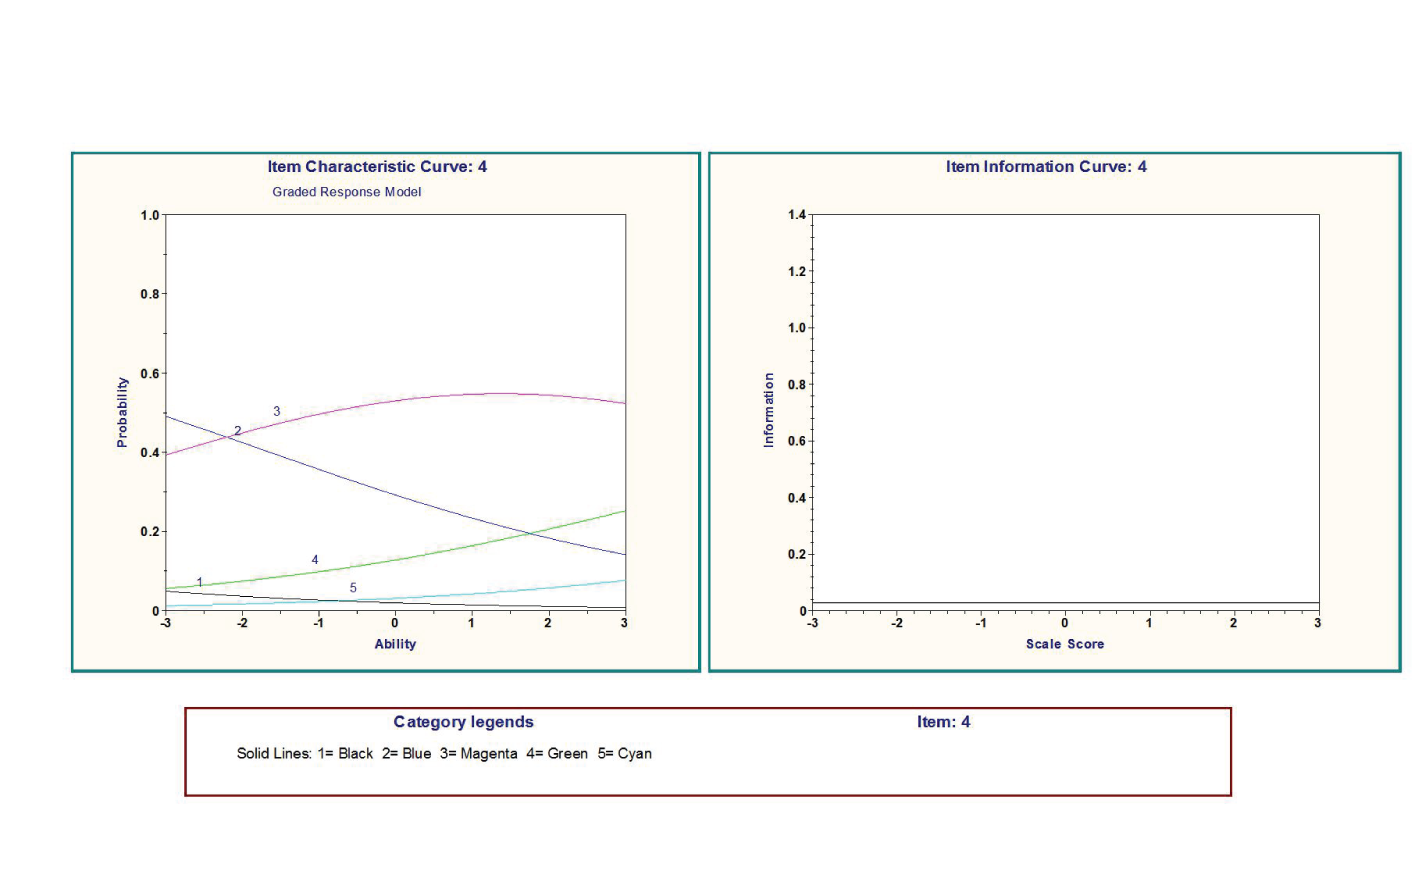
Figure 20: ICC and IIC of item 20 in the version-1 scale


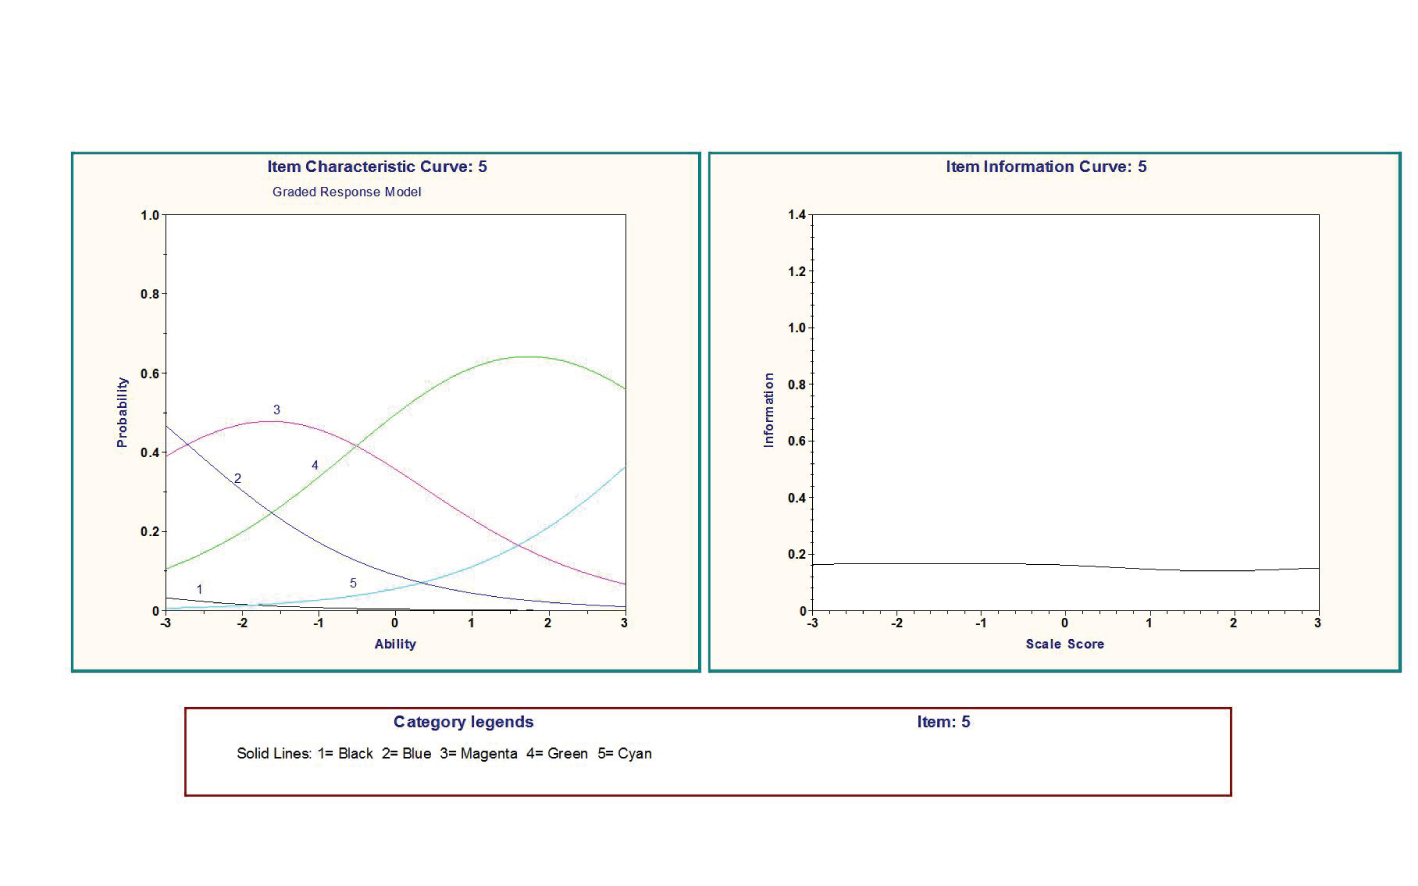


Figure 21: ICC and IIC of item 21 in the version-1 scale


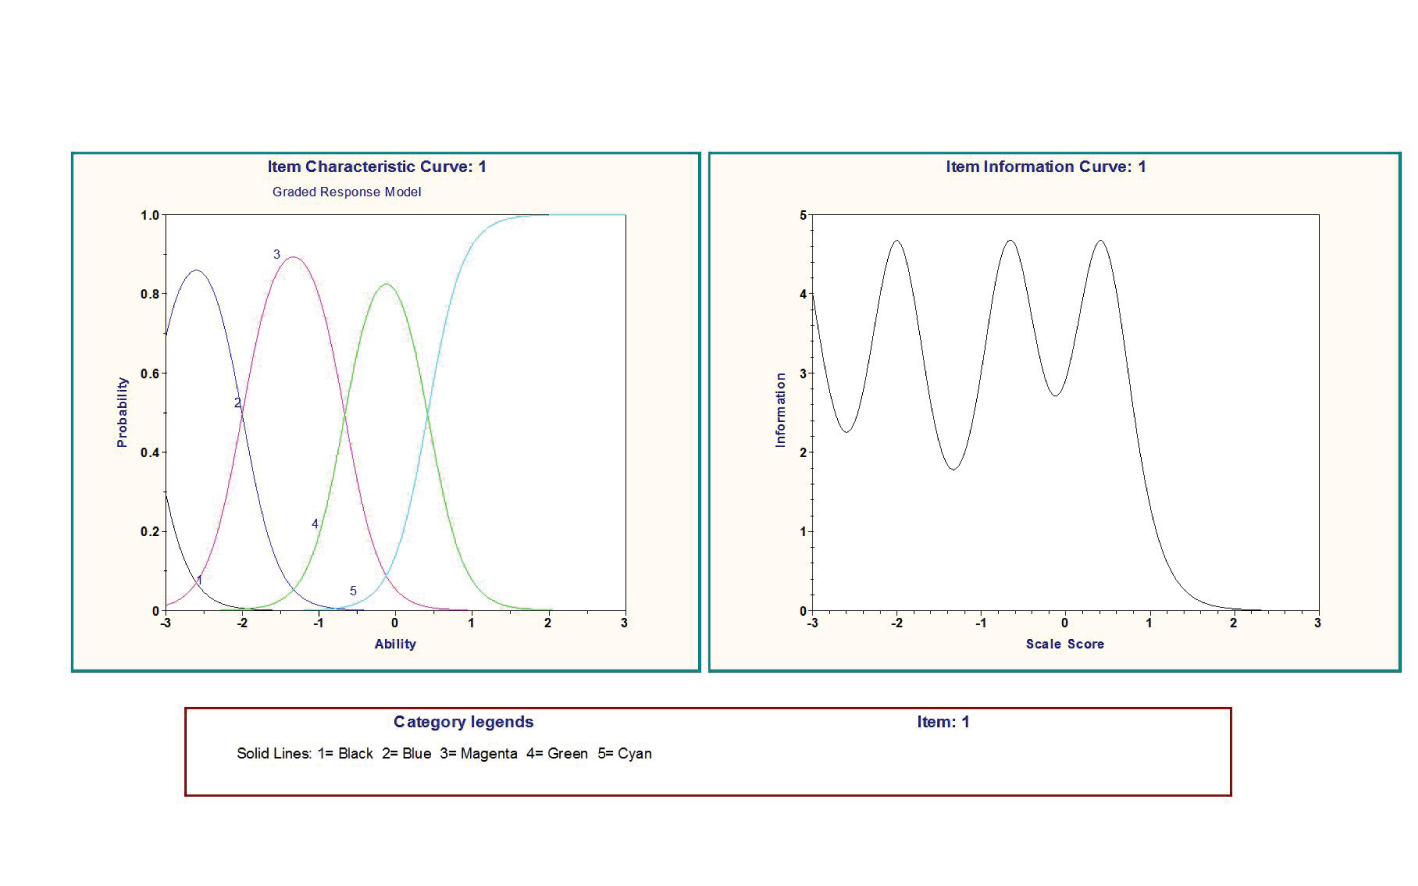


Figure 22: ICC and IIC of item 22 in the version-1 scale


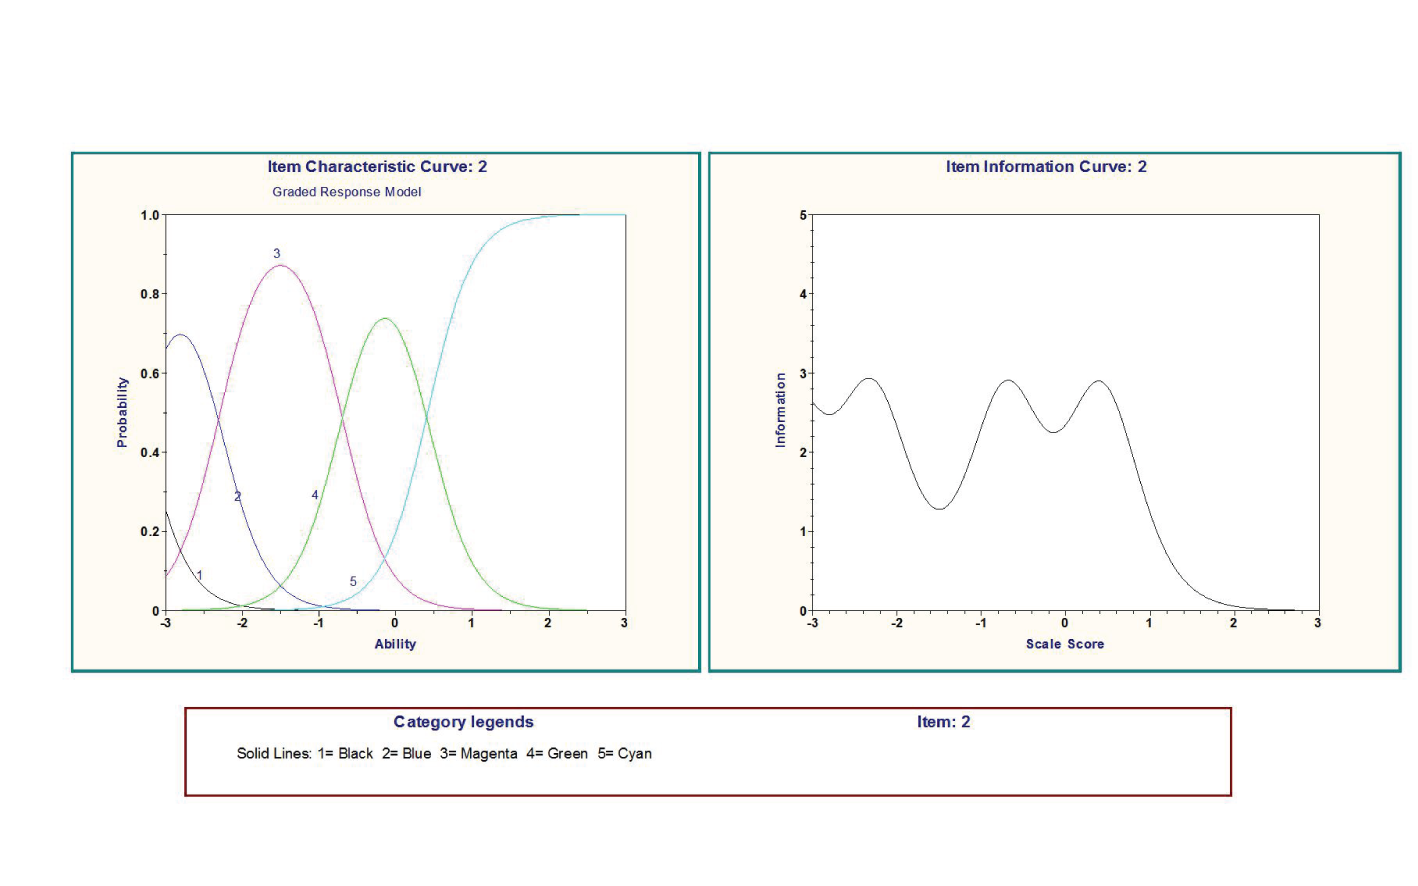
Figure 23: ICC and IIC of item 23 in the version-1 scale


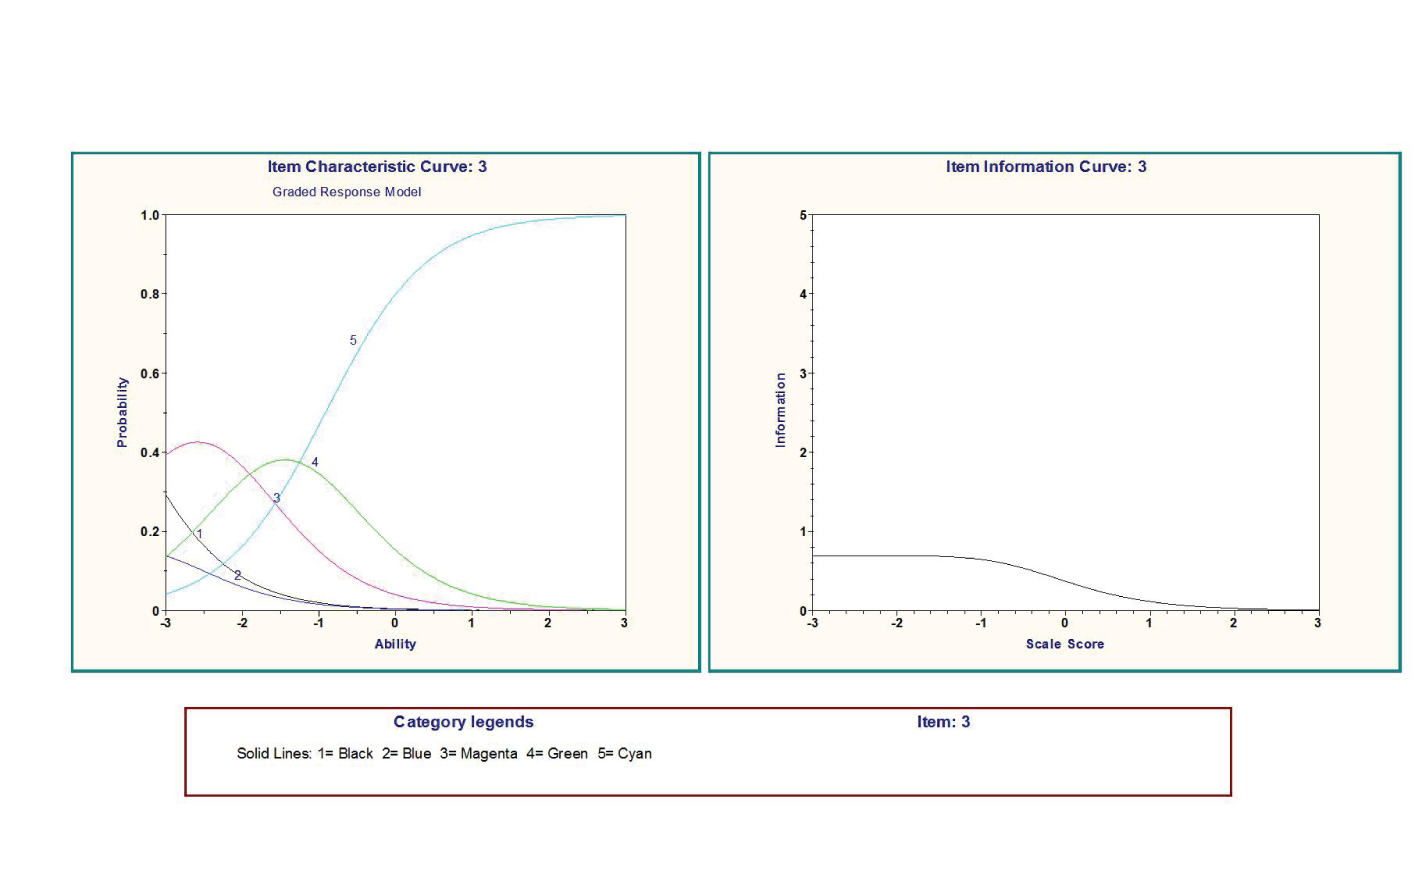


Figure 24: ICC and IIC of item 24 in the version-1 scale


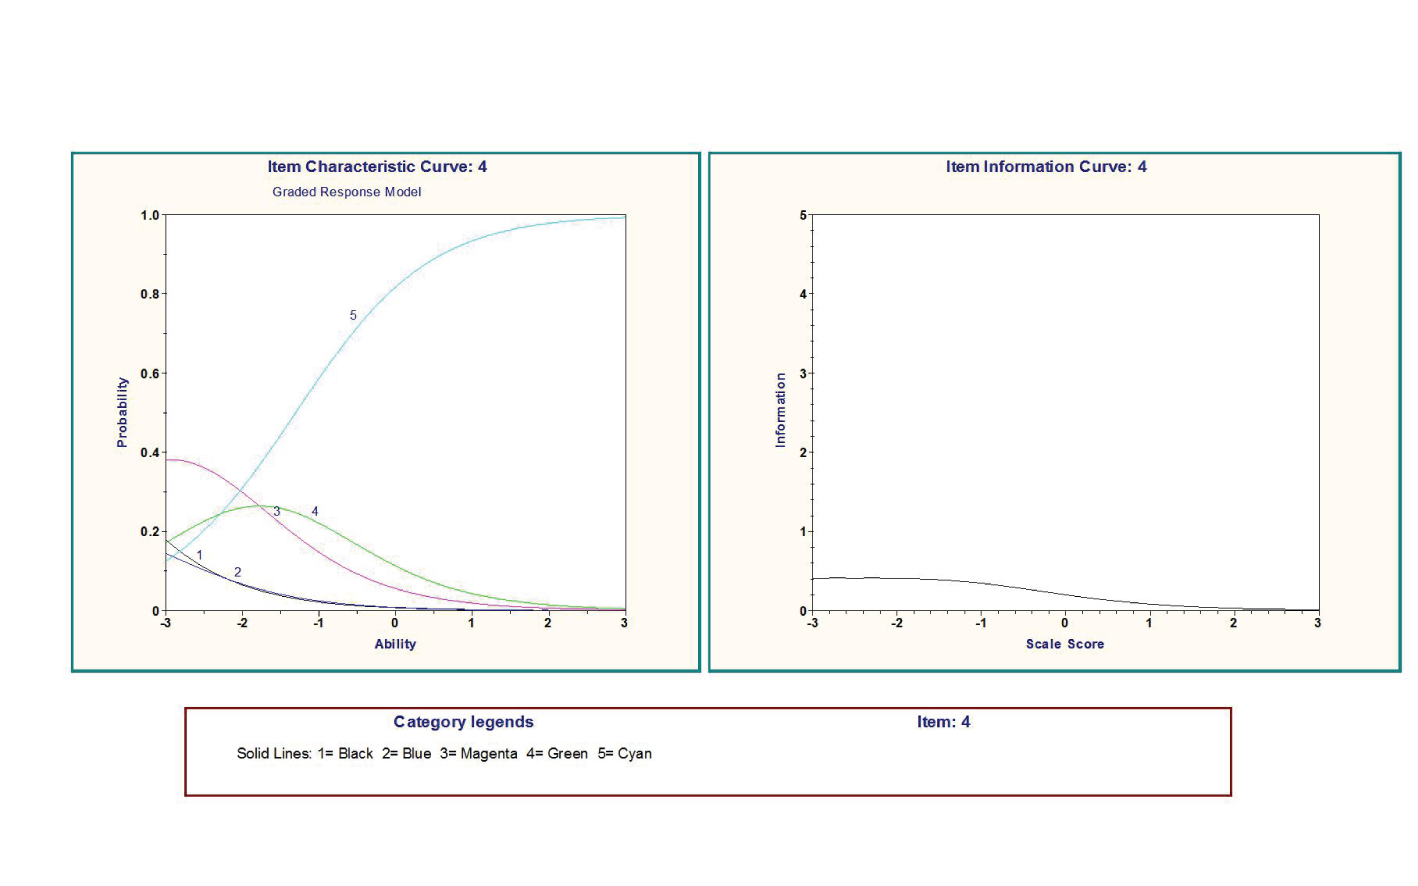


Figure 25: ICC and IIC of item 25 in the version-1 scale


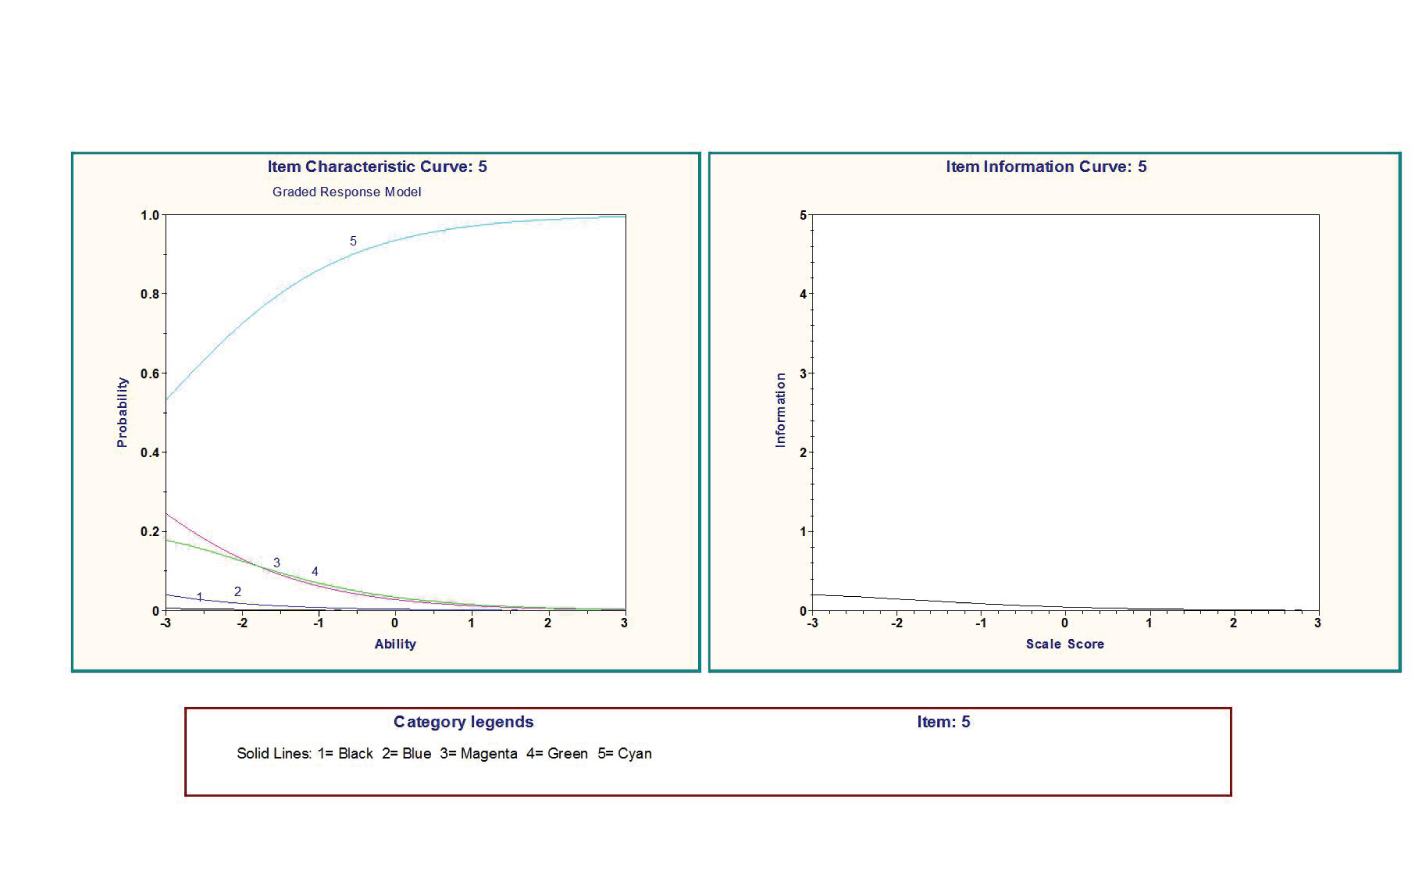


Figure 26: ICC and IIC of item 26 in the version-1 scale

**Supplementary 4:** Item Characteristic Curve(ICC) and Item Information Curve(IIC) of 15 items in the version-2 scale.


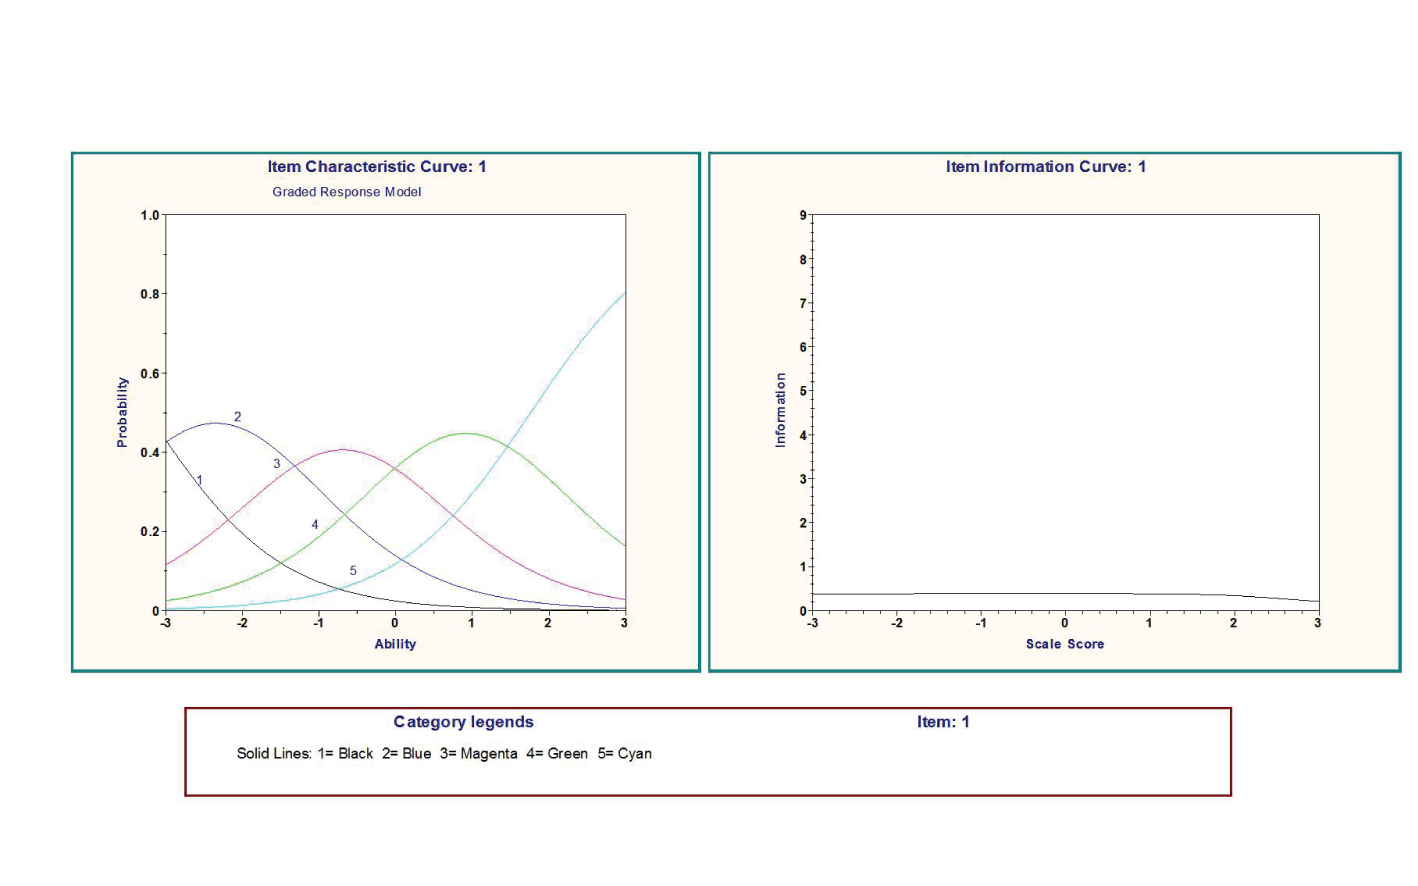


Figure 1: ICC and IIC of item 1 in the version-2 scale


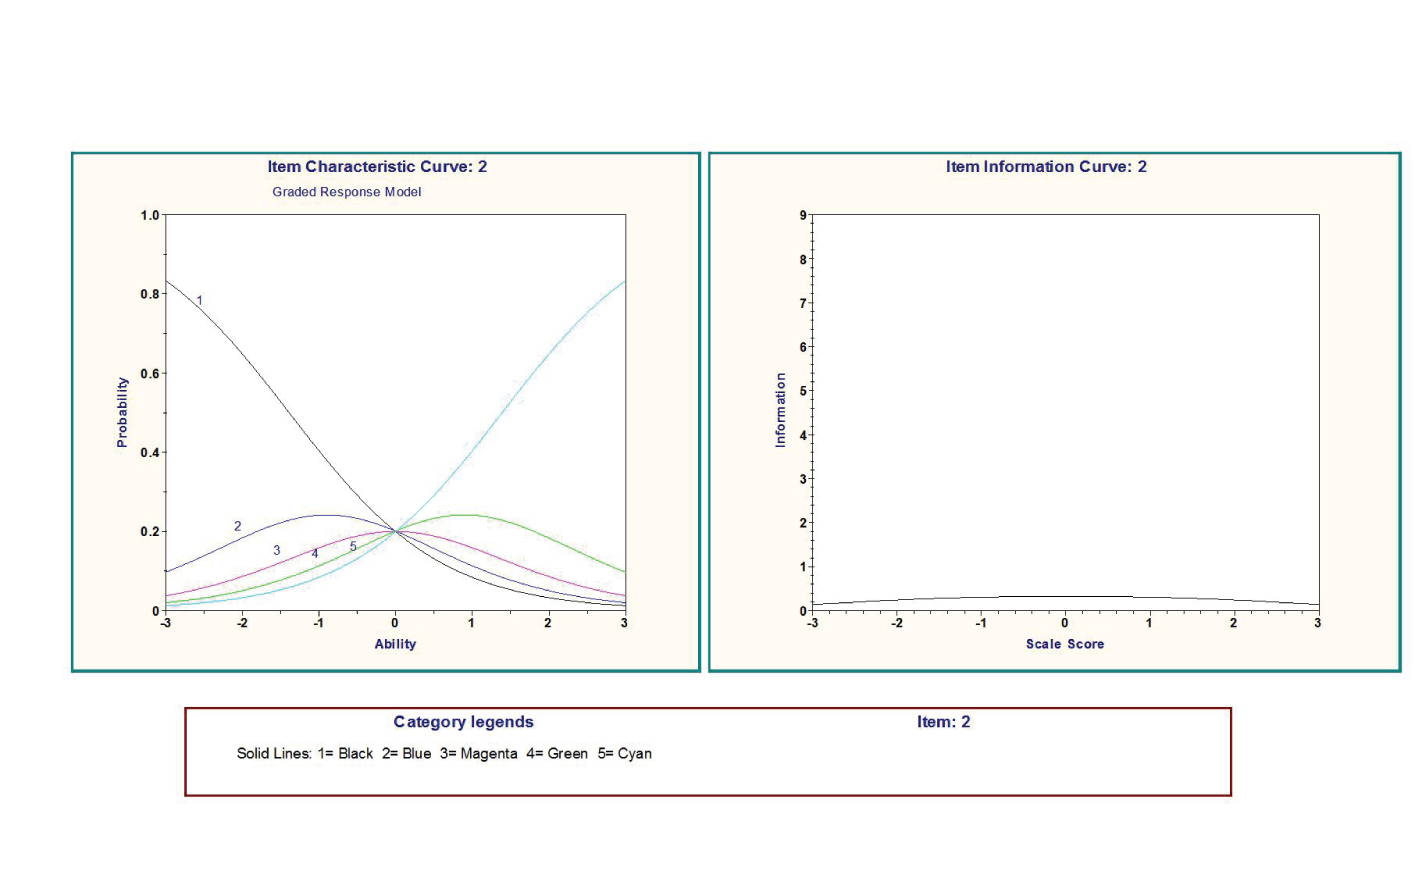
Figure 2: ICC and IIC of item 2 in the version-2 scale


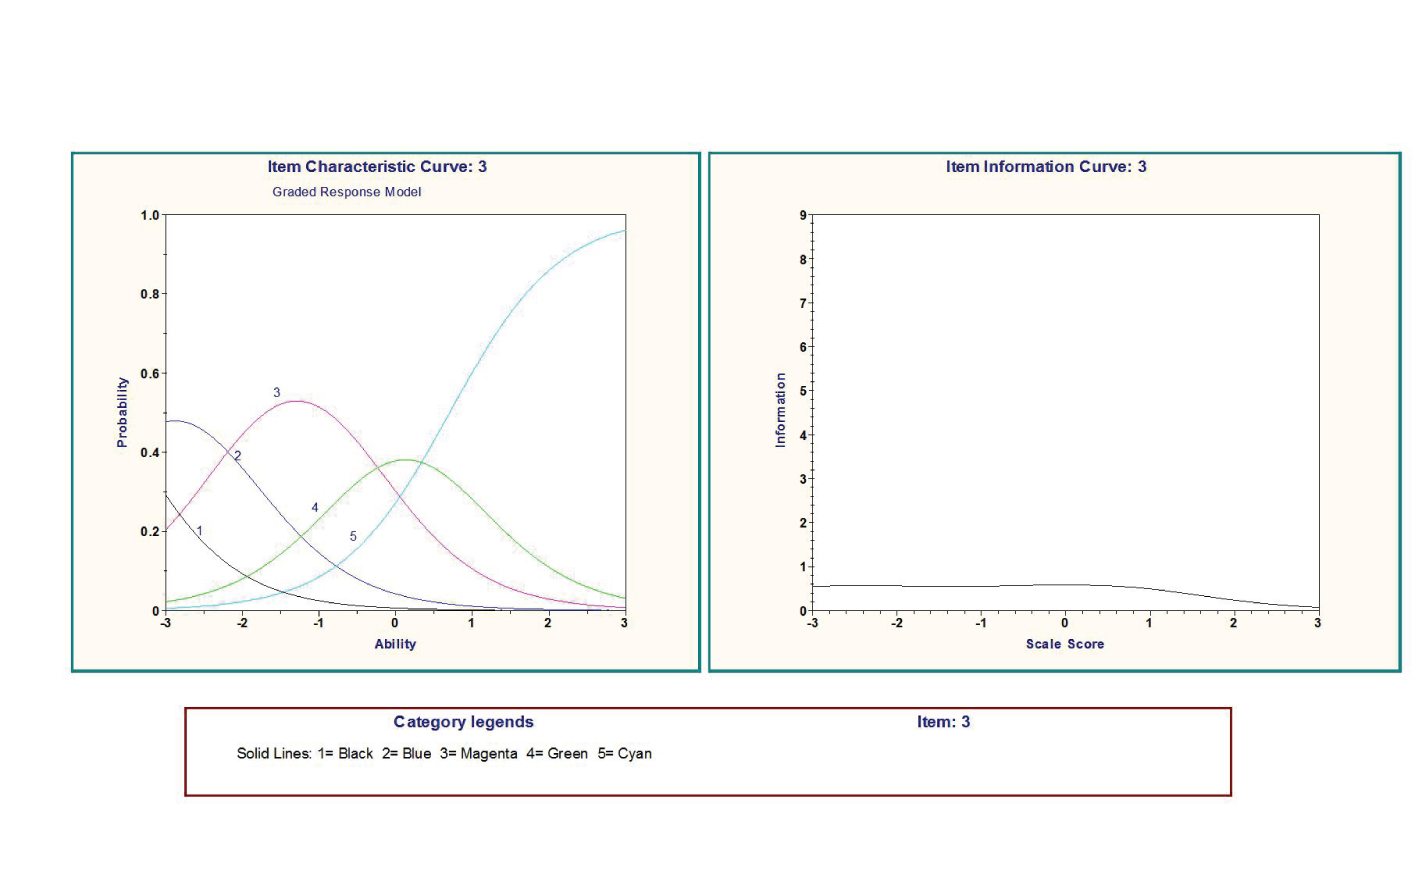
Figure 3: ICC and IIC of item 3 in the version-2 scale


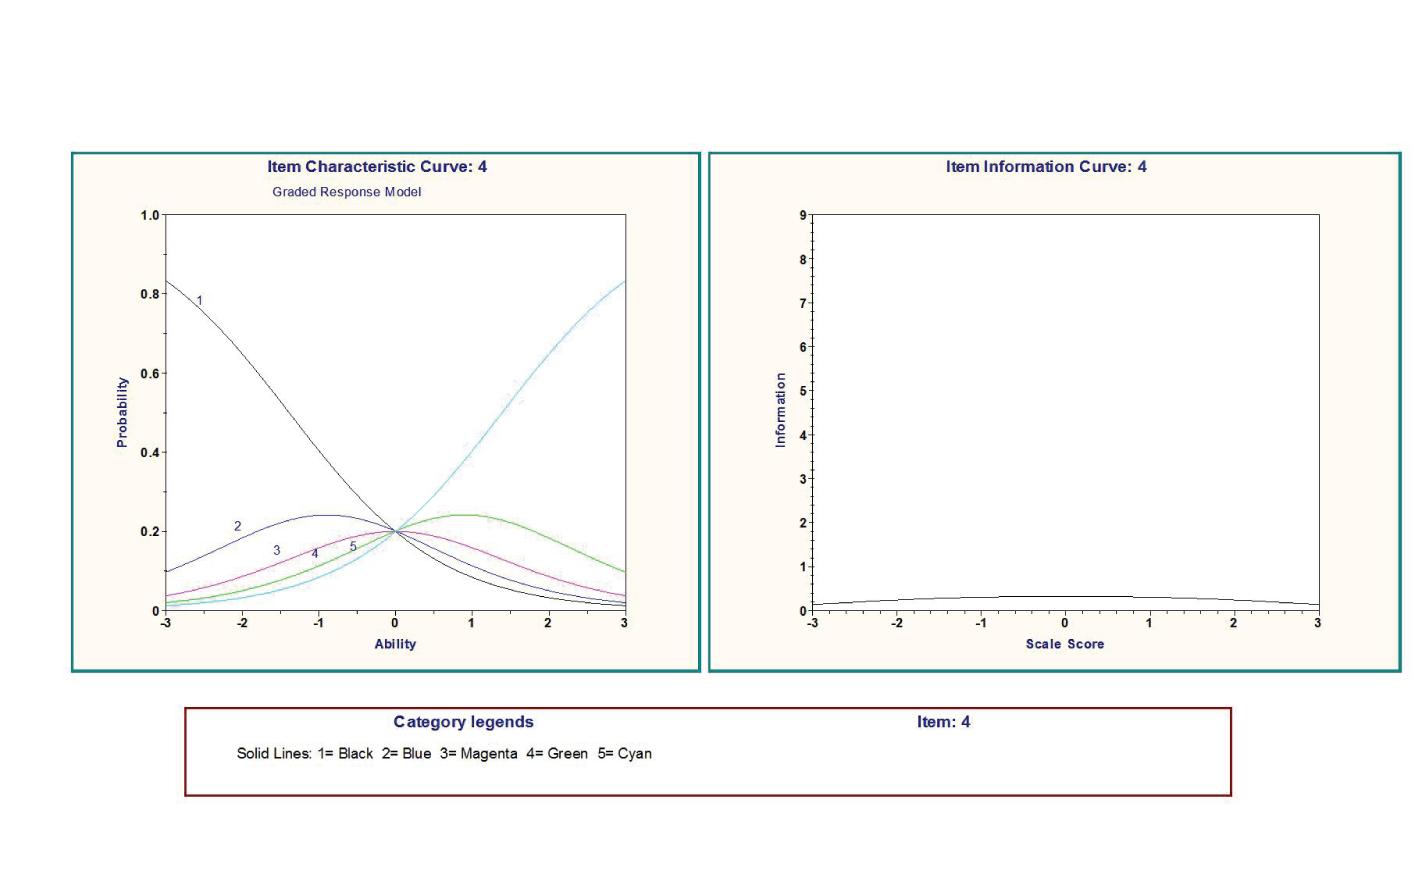
Figure 4: ICC and IIC of item 4 in the version-2 scale


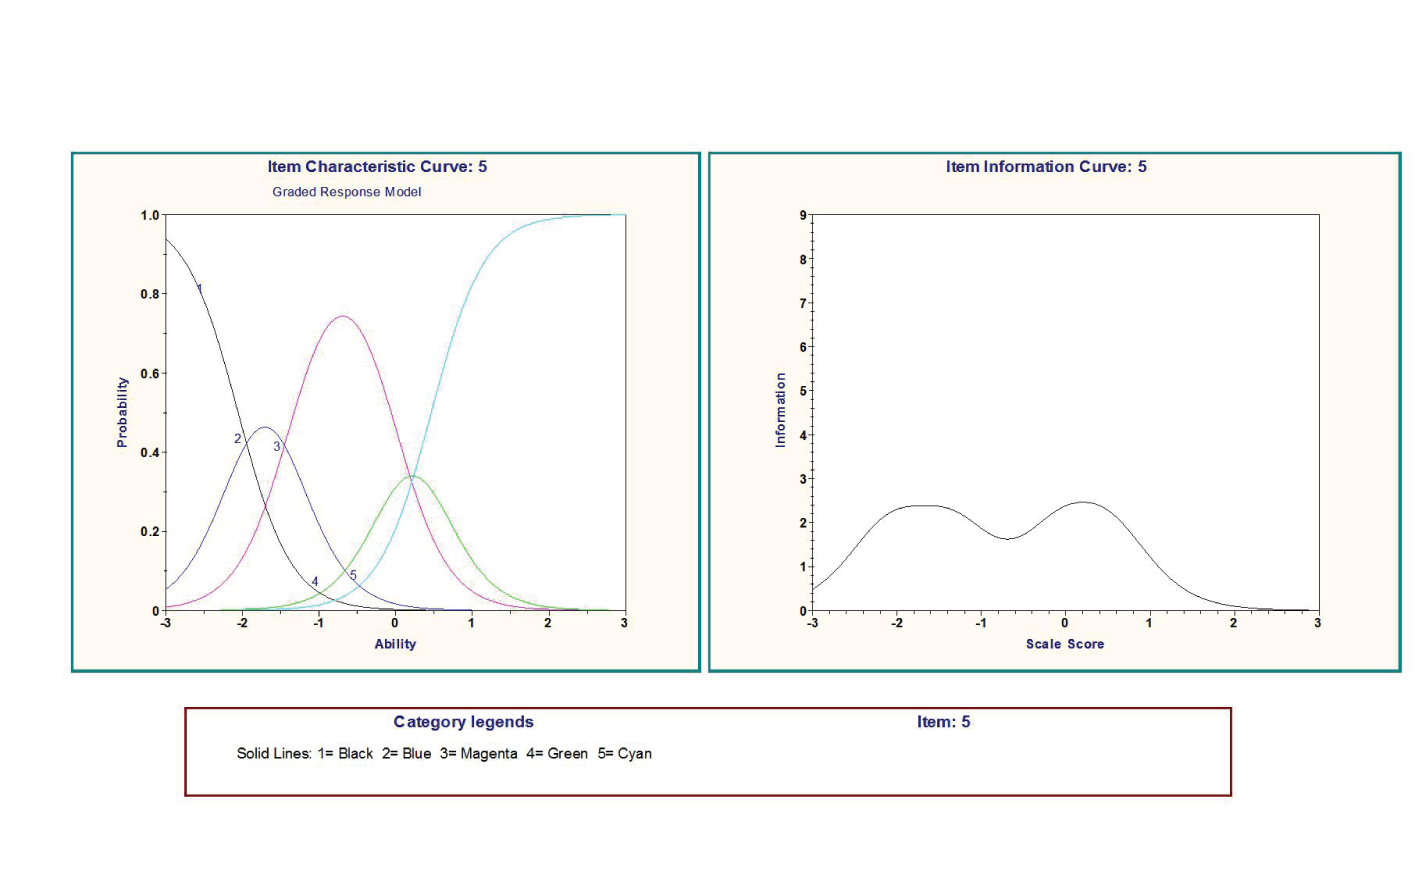
Figure 5: ICC and IIC of item 5 in the version-2 scale


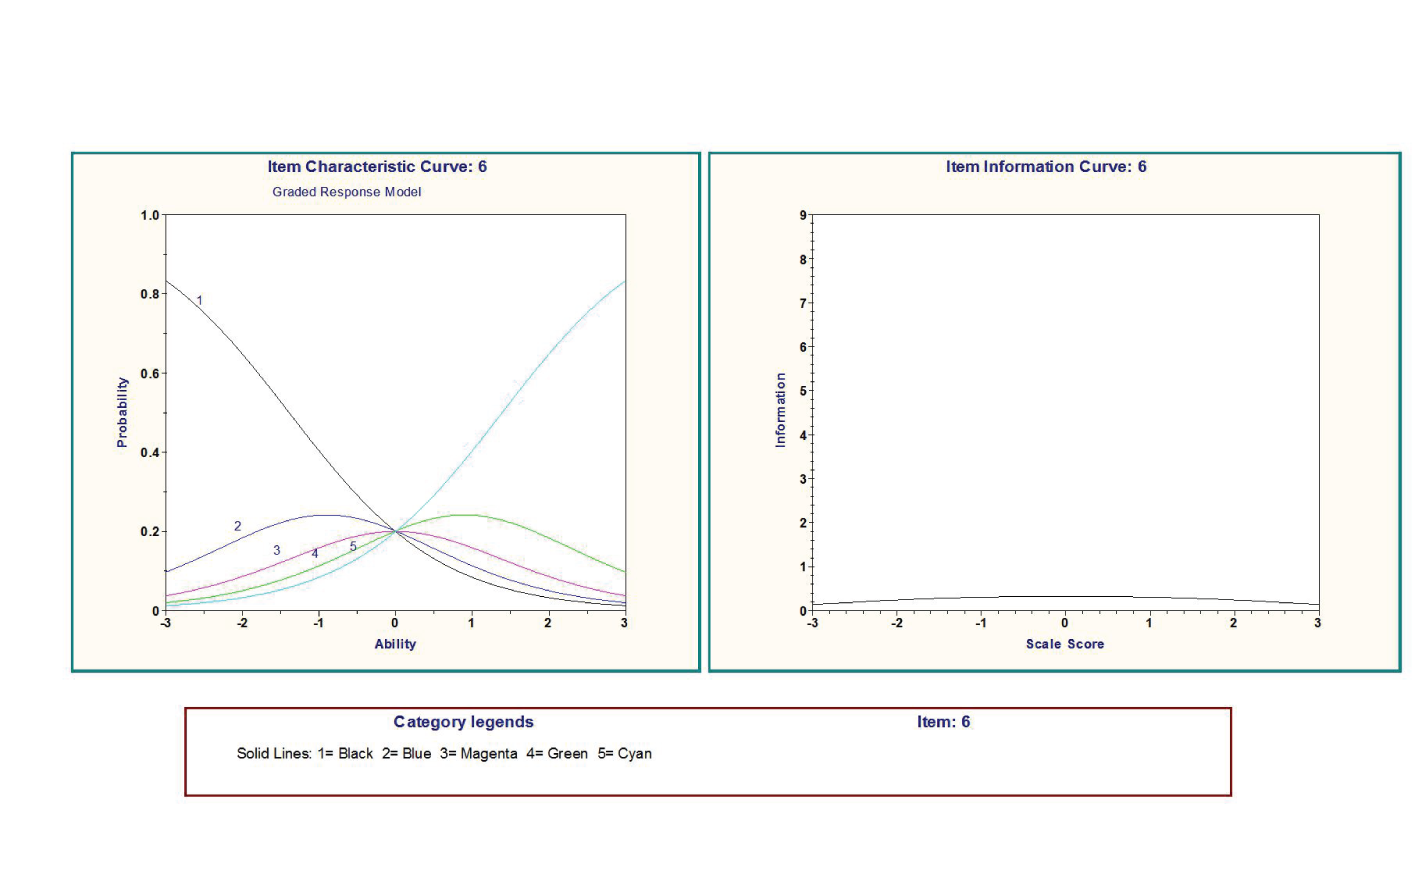
Figure 6: ICC and IIC of item 6 in the version-2 scale


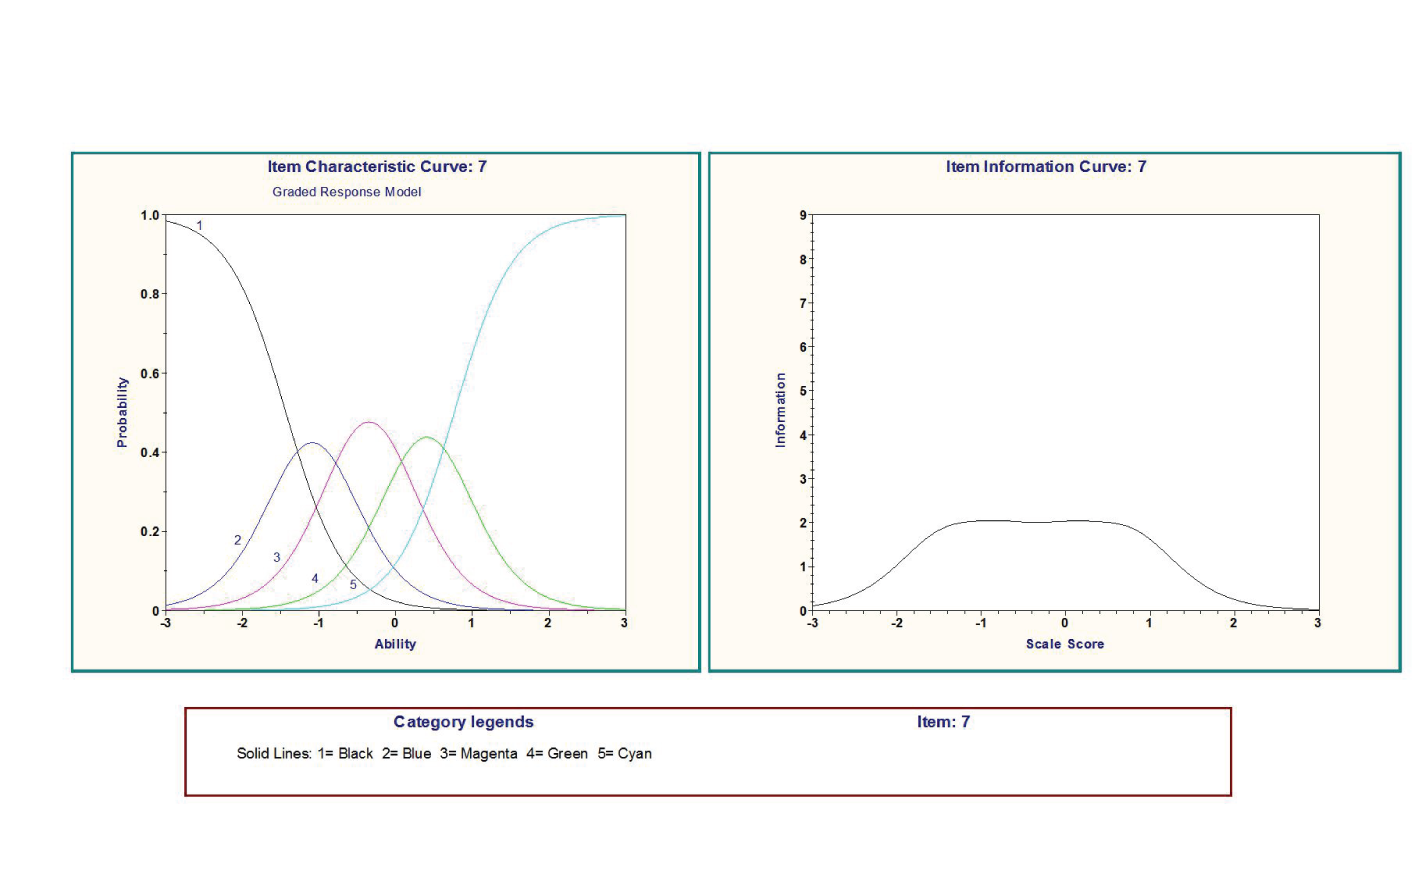


Figure 7: ICC and IIC of item 7 in the version-2 scale


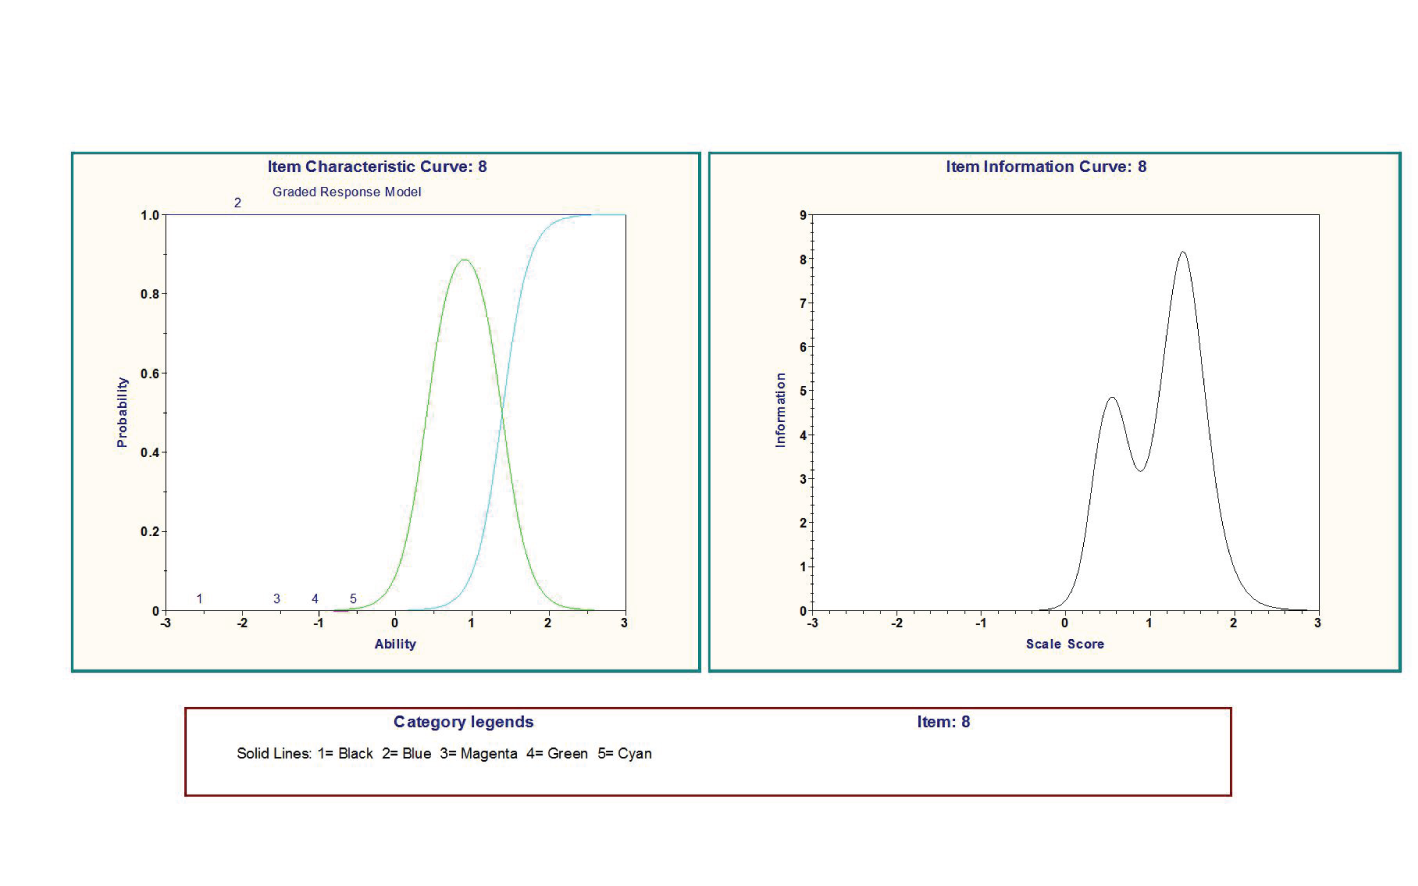
Figure 8: ICC and IIC of item 8 in the version-2 scale


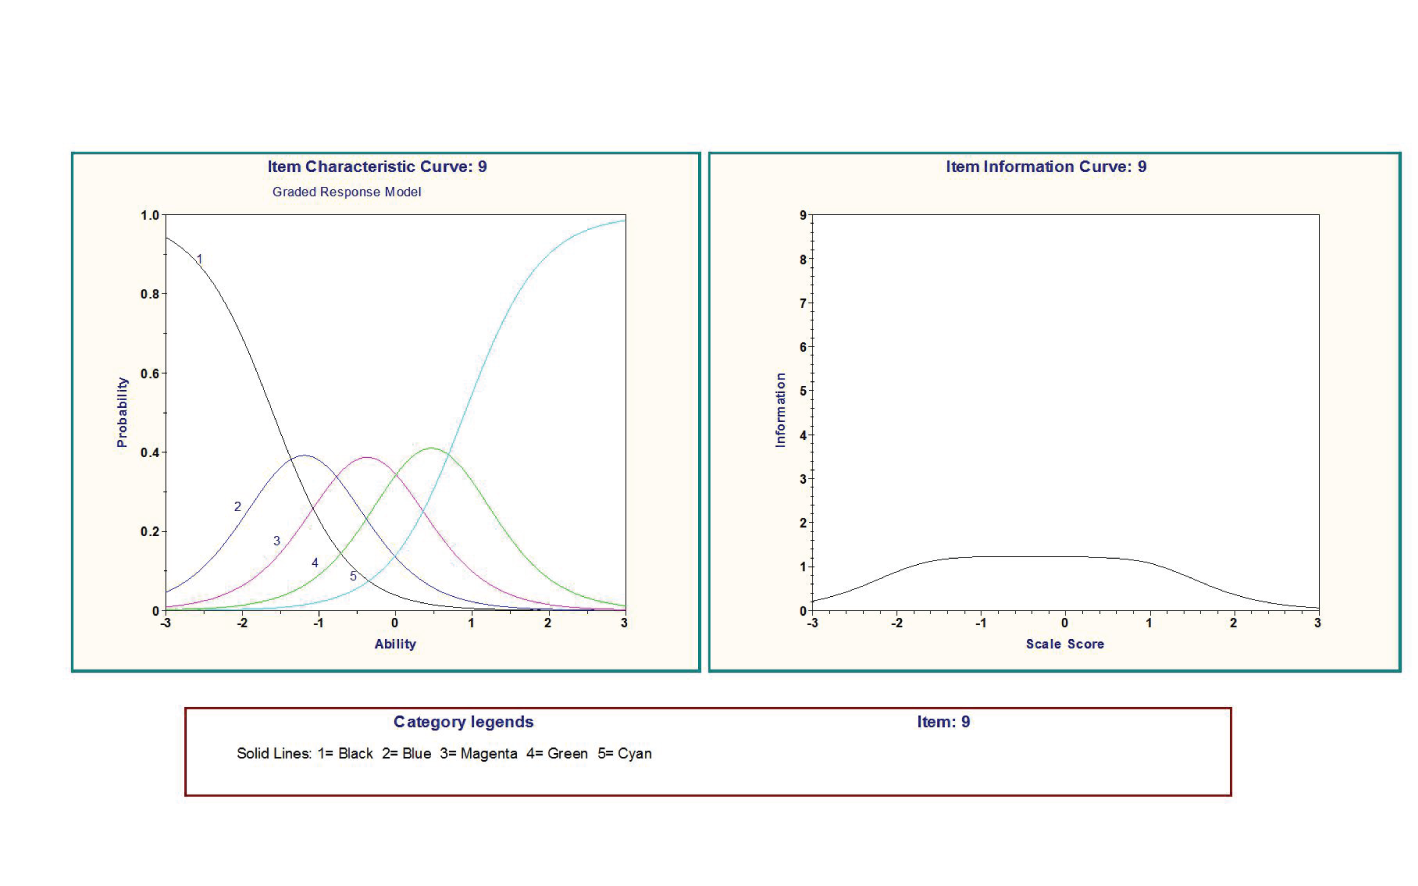


Figure 9: ICC and IIC of item 9 in the version-2 scale


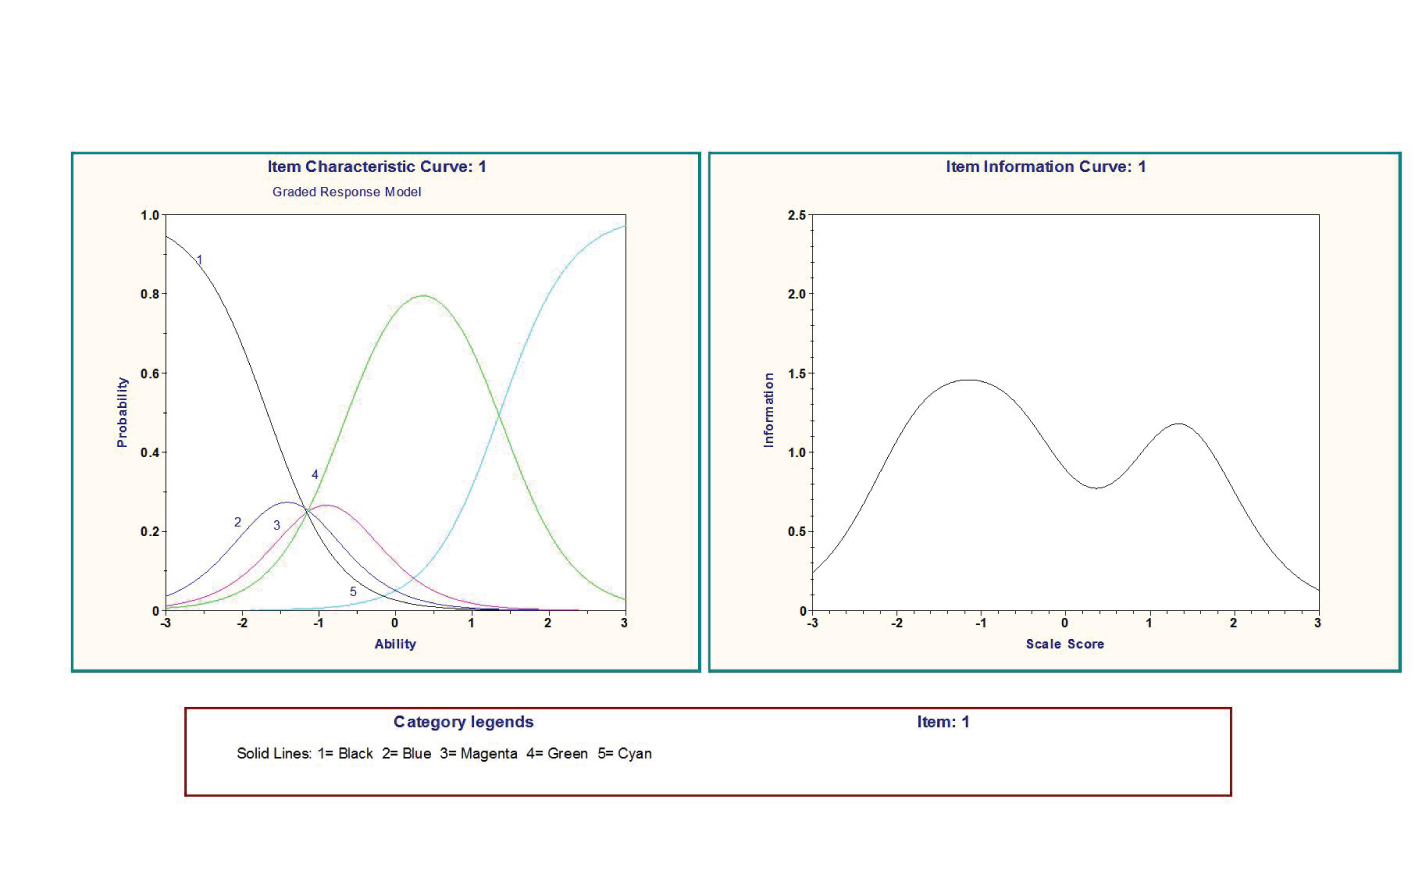


Figure 10: ICC and IIC of item 10 in the version-2 scale


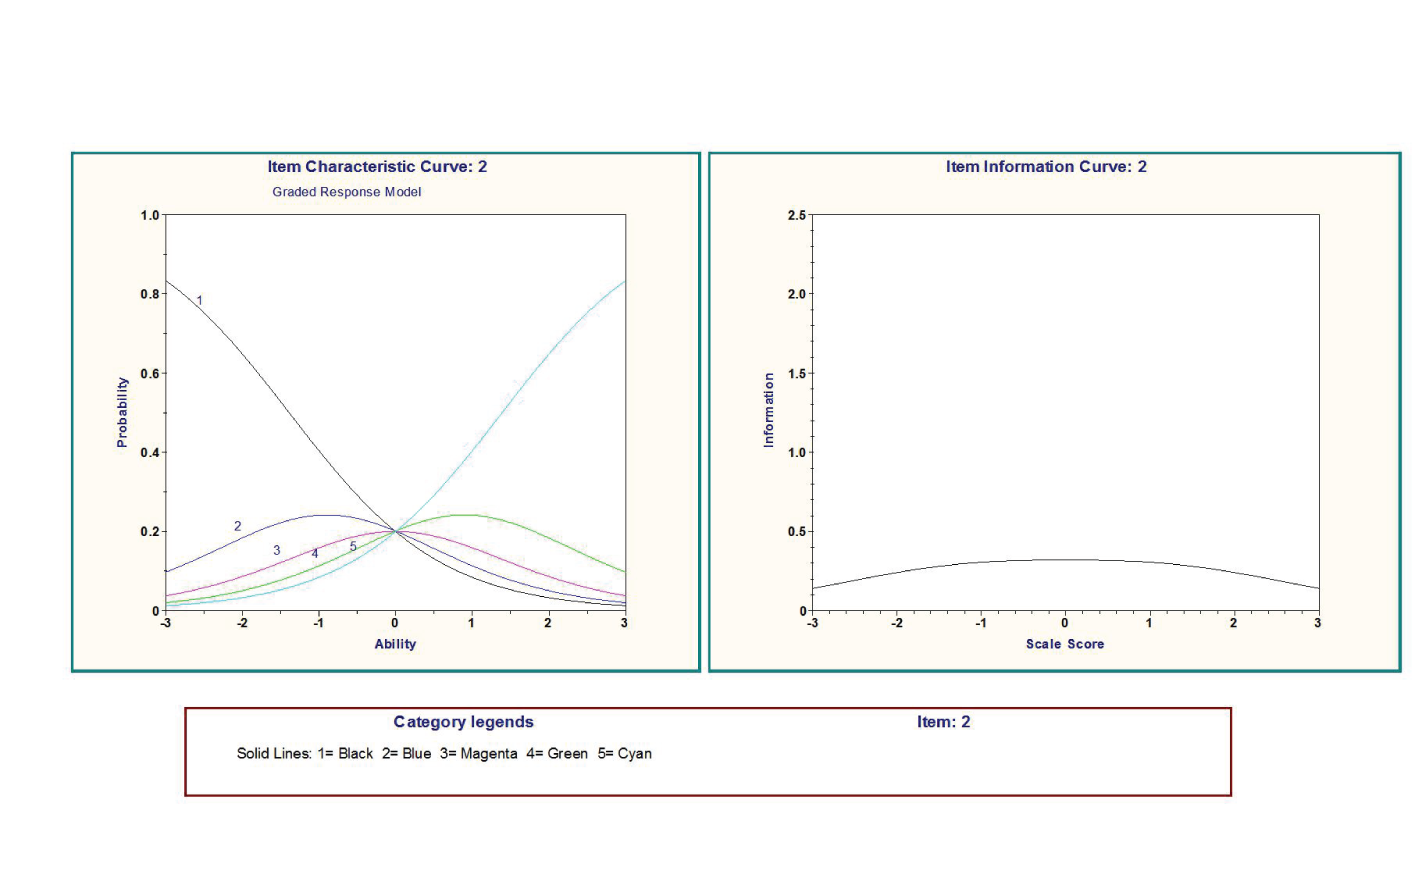


Figure 11: ICC and IIC of item 11 in the version-2 scale


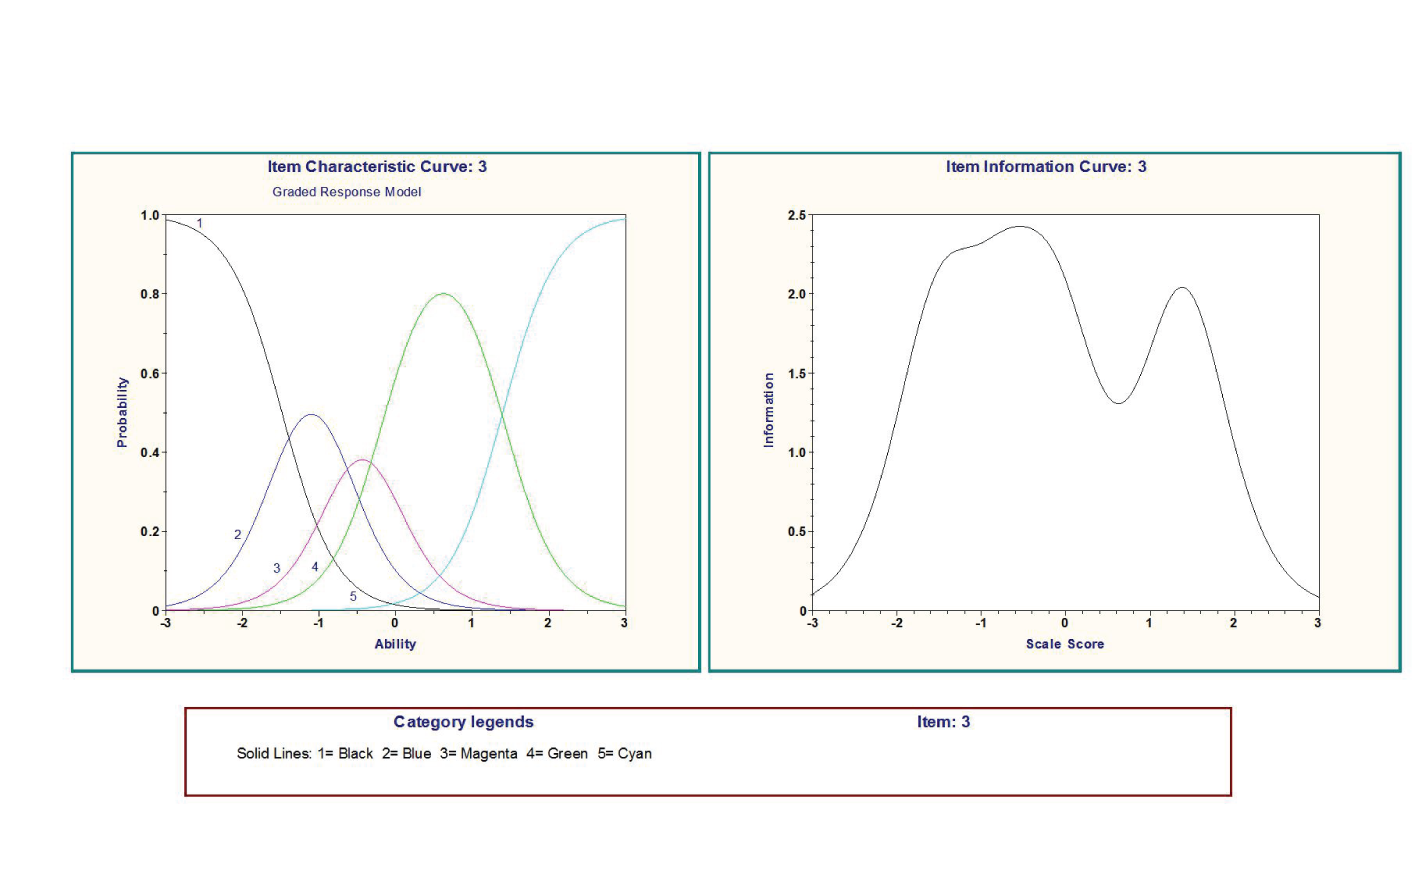
Figure 12: ICC and IIC of item 12 in the version-2 scale


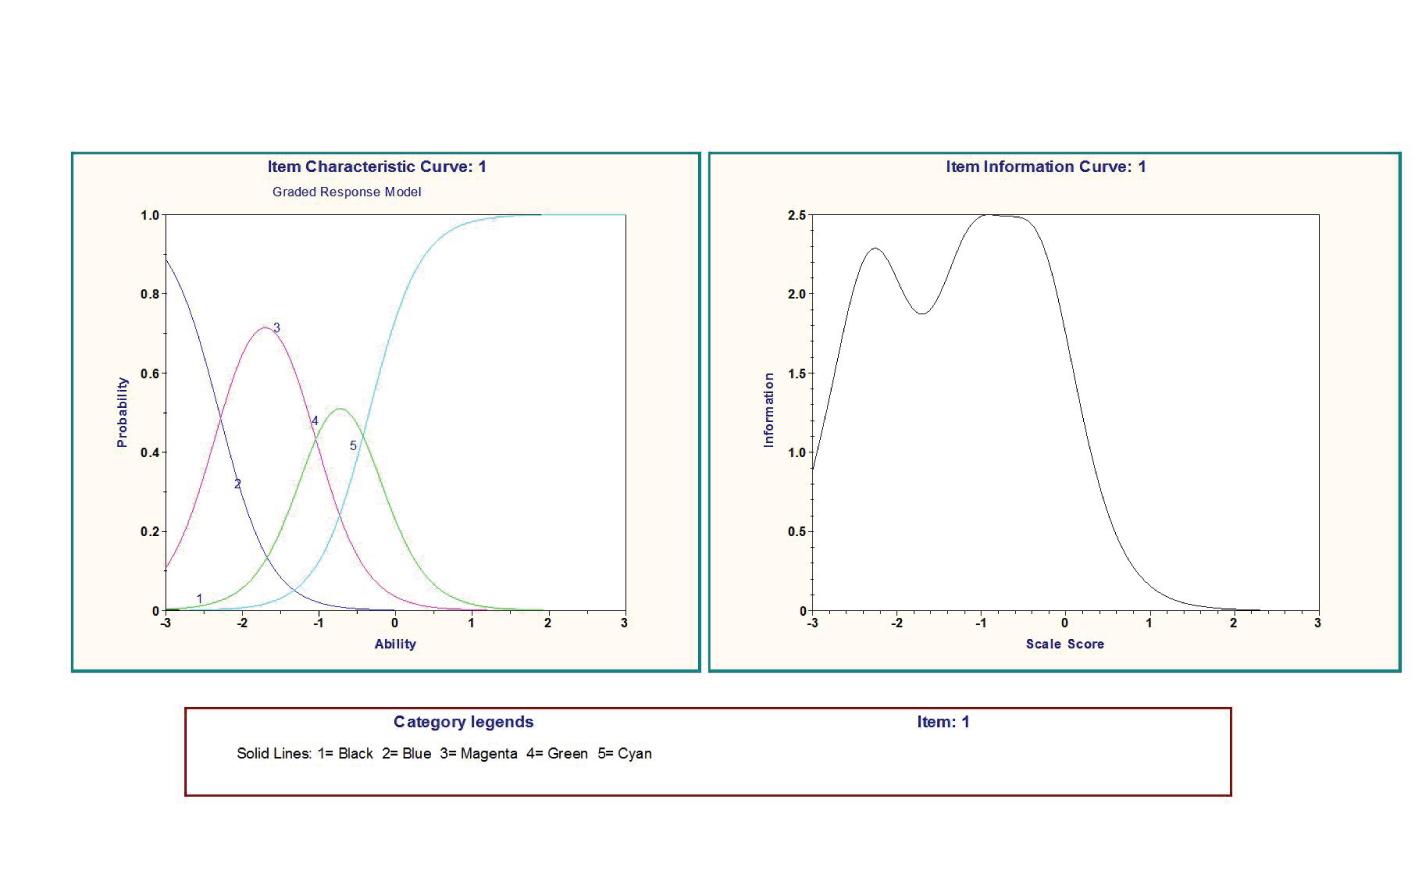


Figure 13: ICC and IIC of item 13 in the version-2 scale


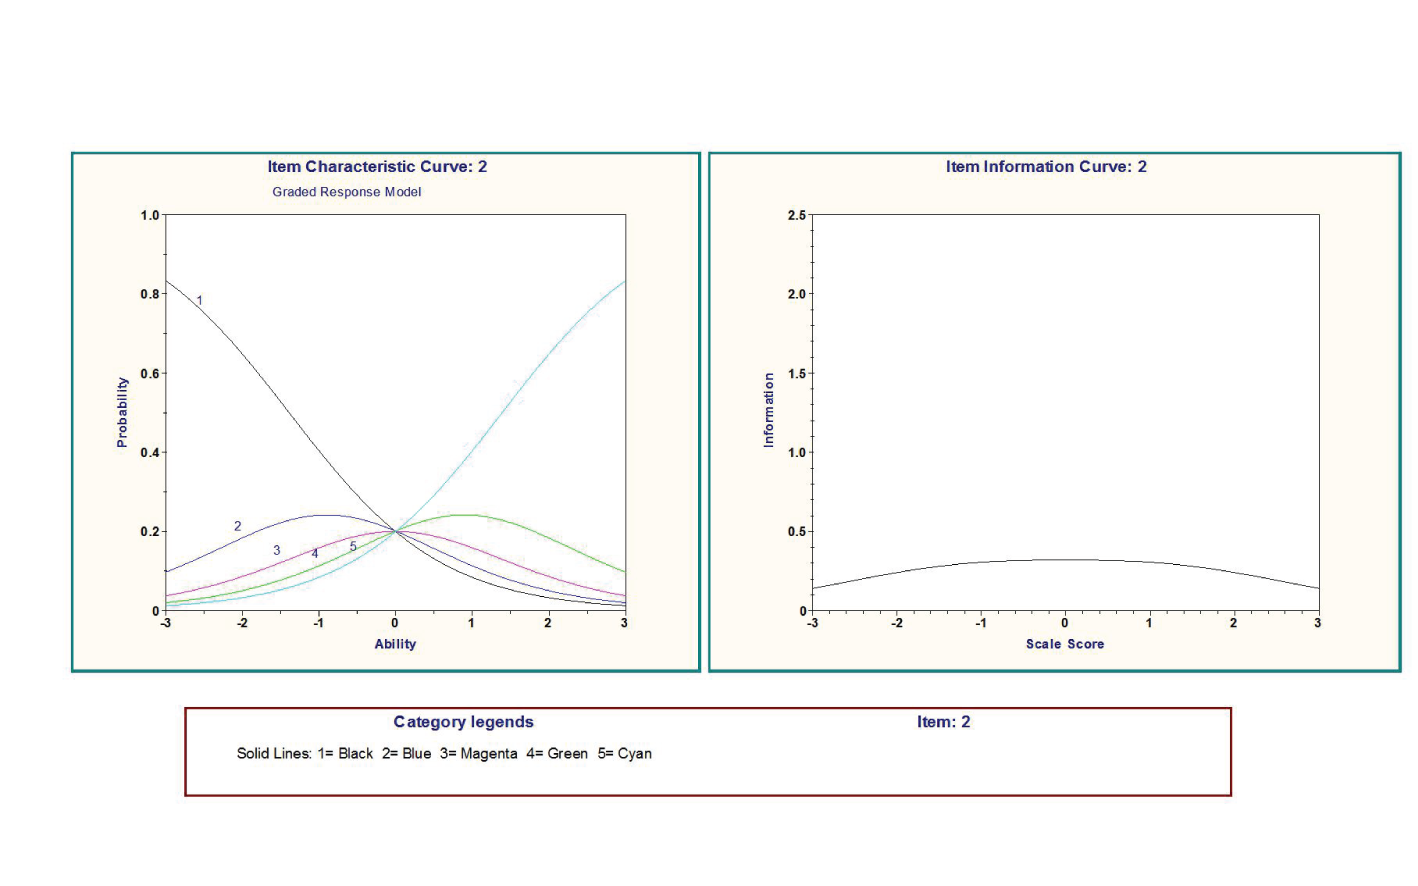
Figure 14: ICC and IIC of item 14 in the version-2 scale


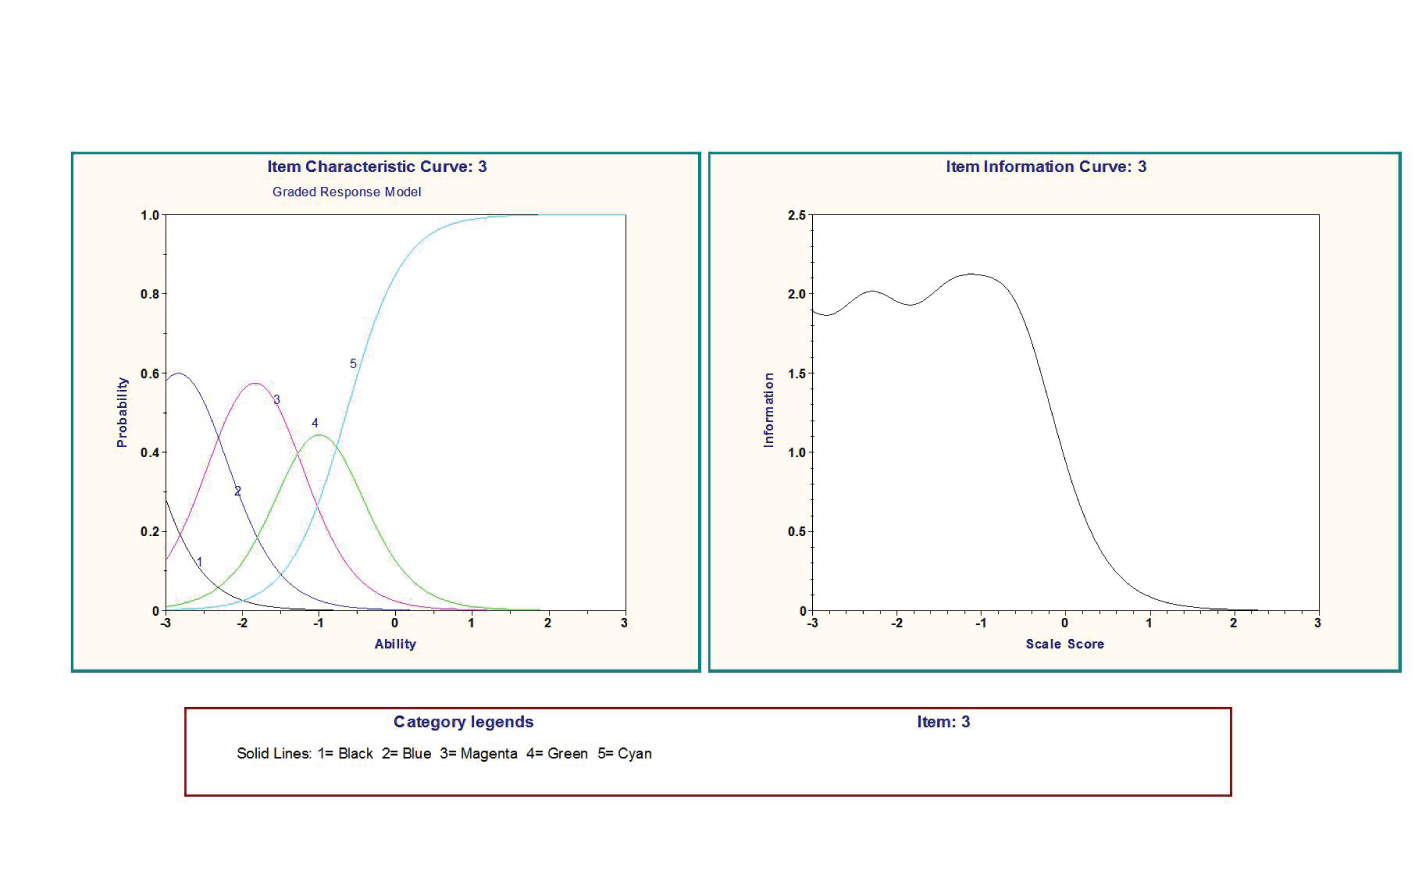


Figure 15: ICC and IIC of item 15 in the version-2 scale

**Supplementary 5:** Exploratory Factor Analysis of 15 items in Version-2 scale using Principal Component Analysis and Direct Oblimin Rotation.

Total variance explained of version-2 scale

| Component | Initial Eigenvalues | | | | | Rotation Sums of Squared Loadings# |
| --- | --- | --- | --- | --- | --- | --- |
| Total | % of Variance | | Cumulative % | | Total |
| 1 | 4.910 | | 32.730 | | 32.730 | 3.891 |
| 2 | 2.049 | | 13.663 | | 46.394 | 2.119 |
| 3 | 1.465 | | 9.766 | | 56.160 | 2.173 |
| 4 | 1.110 | | 7.401 | | 63.560 | 3.530 |

**Notes:**

#When components are correlated, sums of squared loadings cannot be added to obtain a total variance.

Pattern matrix of version-2 scale.

| Item | Component | | | |
| --- | --- | --- | --- | --- |
| 1 | 2 | 3 | 4 |
| 2 | 0.798 | 0.159 | -0.119 | 0.102 |
| 3 | 0.762 | -0.080 | 0.125 | -0.071 |
| 4 | 0.695 | -0.034 | 0.151 | -0.093 |
| 1 | 0.614 | 0.146 | -0.138 | -0.094 |
| 5 | 0.613 | -0.233 | 0.132 | -0.182 |
| 8 | 0.469 | -0.009 | 0.147 | -0.436 |
| 13 | -0.077 | 0.838 | -0.024 | -0.254 |
| 14 | 0.028 | 0.804 | 0.044 | 0.007 |
| 15 | 0.139 | 0.693 | 0.109 | 0.198 |
| 10 | 0.078 | 0.002 | 0.857 | 0.244 |
| 11 | 0.039 | -0.012 | 0.798 | -0.077 |
| 12 | -0.111 | 0.177 | 0.532 | -0.220 |
| 7 | 0.110 | 0.095 | -0.031 | -0.810 |
| 6 | 0.138 | -0.127 | 0.038 | -0.792 |
| 9 | 0.043 | 0.046 | -0.004 | -0.789 |

**Notes:**

Rotation converged in 8 iterations.

Structure matrix of version-2 scale.

| Item | Component | | | |
| --- | --- | --- | --- | --- |
| 1 | 2 | 3 | 4 |
| 3 | 0.808 | 0.026 | 0.271 | -0.425 |
| 4 | 0.760 | 0.070 | 0.295 | -0.424 |
| 2 | 0.749 | 0.227 | 0.034 | -0.234 |
| 5 | 0.691 | -0.137 | 0.250 | -0.463 |
| 8 | 0.687 | 0.086 | 0.317 | -0.669 |
| 1 | 0.646 | 0.201 | 0.015 | -0.345 |
| 13 | 0.124 | 0.840 | 0.124 | -0.260 |
| 14 | 0.124 | 0.813 | 0.157 | -0.056 |
| 15 | 0.151 | 0.713 | 0.191 | 0.080 |
| 10 | 0.132 | 0.114 | 0.825 | 0.048 |
| 11 | 0.222 | 0.105 | 0.818 | -0.245 |
| 12 | 0.106 | 0.249 | 0.577 | -0.281 |
| 7 | 0.469 | 0.146 | 0.155 | -0.857 |
| 6 | 0.478 | -0.064 | 0.197 | -0.852 |
| 9 | 0.393 | 0.092 | 0.159 | -0.809 |
